1 **A population of neurons that produce hugin and express the *diuretic hormone 44 receptor***  
2 **gene projects to the corpora allata in *Drosophila melanogaster***

3

4 Yosuke Mizuno<sup>1</sup>, Eisuke Imura<sup>1,6</sup>, Yoshitomo Kurogi<sup>1</sup>, Yuko Shimadaigu-Niwa<sup>2</sup>, Shu Kondo<sup>3</sup>,  
5 Hiromu Tanimoto<sup>4</sup>, Sebastian Hückesfeld<sup>5</sup>, Michael J. Pankratz<sup>5</sup>, and Ryusuke Niwa<sup>2,\*</sup>

6

7 <sup>1</sup> Graduate School of Life and Environmental Sciences, University of Tsukuba, Tennodai 1-1-1,  
8 Tsukuba, Ibaraki 305-8572, Japan

9 <sup>2</sup> Life Science Center for Survival Dynamics, Tsukuba Advanced Research Alliance (TARA),  
10 University of Tsukuba, Tennodai 1-1-1, Tsukuba, Ibaraki 305-8577, Japan

11 <sup>3</sup> Invertebrate Genetics Laboratory, National Institute of Genetics, Mishima, Shizuoka 411-8540,  
12 Japan

13 <sup>4</sup> Graduate School of Life Sciences, Tohoku University, Katahira 2-1-1, Sendai, Miyagi 980-  
14 8577, Japan

15 <sup>5</sup> Life and Medical Sciences Bonn, University of Bonn, Carl-Troll-Str. 31 (1.OG), D-53115 Bonn,  
16 Germany

17

18 <sup>6</sup> Present address: Department of Entomology, Institute for Integrative Genome Biology,  
19 University of California, Riverside, Riverside, CA 92521, USA

20

21 \* Correspondence: ryusuke-niwa@tara.tsukuba.ac.jp

22

23 Running title: *Drosophila* corpora allata-projecting neurons

24

25 **Abstract**

26 The corpora allata (CA) are essential endocrine organs that biosynthesize and secrete the  
27 sesquiterpenoid hormone, namely juvenile hormone (JH), to regulate a wide variety of  
28 developmental and physiological events in insects. Previous studies had demonstrated that the  
29 CA are directly innervated with neurons in many insect species, implying the innervations to be  
30 important for regulating JH biosynthesis in response to internal physiology and external  
31 environments. While this is also true for the model organism, *Drosophila melanogaster*, which  
32 neurotransmitters are produced in the CA-projecting neurons are yet to be clarified. In this study  
33 on *D. melanogaster*, we aimed to demonstrate that a subset of neurons producing the  
34 neuropeptide hugin, the invertebrate counterpart of the vertebrate neuromedin U, directly  
35 projects to the adult CA. A synaptic vesicle marker in the hugin neurons was observed at their  
36 axon termini located on the CA, which were immunolabeled with a newly-generated antibody to  
37 the JH biosynthesis enzyme JH acid *O*-methyltransferase (JHAMT). We also found the CA-  
38 projecting hugin neurons to likely express a gene encoding the specific receptor for diuretic  
39 hormone 44 (Dh44). Moreover, our data suggested that the CA-projecting hugin neurons have  
40 synaptic connections with the upstream neurons producing Dh44. To the best of our knowledge,  
41 this is the first study to identify a specific neurotransmitter of the CA-projecting neurons in *D.*  
42 *melanogaster*, and to anatomically characterize a neuronal pathway of the CA-projecting neurons  
43 and their upstream neurons.

44

45 Key words:

46 Corpora allata, Diuretic hormone 44, *Drosophila melanogaster*, Hugin, Juvenile hormone

47

48

## 49 **Introduction**

50 An endocrine organ is responsible for biosynthesizing specific hormones to control animal  
51 development and physiology. In general, hormone biosynthesis in the endocrine organ is  
52 influenced by conditions of internal physiology and external environments, and regulates  
53 organismal homeostasis. In vertebrates, most endocrine organs are innervated with sympathetic  
54 and parasympathetic nerves, and the innervations play indispensable roles in the regulation of  
55 hormone biosynthesis (Schmidt-Nielsen, 1997).

56 Insect endocrine organs are also regulated by neurons that directly innervate the organs.  
57 One of the best examples is the prothoracic gland (PG), which biosynthesizes and secretes the  
58 principal insect steroid hormone ecdysone (Niwa and Niwa, 2014a; Pan et al., 2020), while the  
59 neurons produce prothoracicotropic hormone (PTTH) in the fruit fly *Drosophila melanogaster*  
60 (Kannangara et al., 2021; Malita and Rewitz, 2021; McBrayer et al., 2007; Niwa and Niwa,  
61 2014b). Two pairs of cell bodies of the PTTH neurons are located in the brain hemispheres,  
62 extending their axons to the PG cells. PTTH is released at the synapses between PTTH neurons  
63 and the PG cells, stimulating the biosynthesis and secretion of ecdysone to regulate the timing of  
64 larval-to-pupal transition as well as body growth (McBrayer et al., 2007; Shimell et al., 2018). In  
65 addition to PTTH neurons, a subpopulation of serotonergic neurons is known to directly  
66 innervate the PG to regulate ecdysone biosynthesis in *D. melanogaster*. Cell bodies of the PG-  
67 projecting serotonergic neurons, called SE<sub>0PG</sub> neurons, are located at the subesophageal zone  
68 (SEZ) and extend their long axons to the PG. The SE<sub>0PG</sub> neurons are essential for controlling  
69 developmental timing in response to nutritional availability (Shimada-Niwa and Niwa, 2014).  
70 Recently, a subset of neurons producing the neuropeptide corazonin (Crz) has been reported to  
71 project to the PG in *D. melanogaster*, although the role of Crz neurons in ecdysone biosynthesis  
72 is still unclear (Imura et al., 2020).

73 Another endocrine organ in insects, the corpus allatum (plural: corpora allata (CA)), is  
74 also innervated with certain neurons. The CA are crucial organs for the biosynthesis and  
75 secretion of the sesquiterpenoid hormone named juvenile hormone (JH), which plays essential  
76 roles in a wide variety of aspects of insect development and physiology, including the larval-to-  
77 adult transition, oogenesis, epithelial morphogenesis, neuronal development, diapause, behavior,  
78 and longevity (Martín et al., 2021; Riddiford, 2020). Previous studies had suggested that  
79 neuronal inputs to the CA are essential for regulating JH biosynthesis and/or secretion, thereby  
80 regulating the biological events. For example, in the acridid grasshopper *Gomphocerus rufus*,  
81 and the locusts *Locusta migratoria* and *Schistocerca gregaria*, the CA are innervated with two  
82 morphologically distinct types of brain neurons (Virant-Doberlet et al., 1994). In the cockroach  
83 *Diploptera punctata*, nervous connections between the CA and brain are required for mitosis of  
84 the CA cells (Chiang et al., 1995). In the northern blowfly *Protophormia terraenovae* and the  
85 brown-winged green bug *Plautia stali*, neurons projecting to the CA are essential for inducing  
86 reproductive dormancy in short-day and low-temperature conditions (Matsumoto et al., 2013;  
87 Shiga et al., 2003). In case of *P. stali*, the CA-projecting neurons produce the neuropeptide  
88 *Plautia stali* myoinhibitory protein (Plast-MIP), which is considered to directly suppress JH  
89 biosynthesis in the CA (Hasegawa et al., 2020; Matsumoto et al., 2017). In *D. melanogaster*, at  
90 least two types of neurons had been reported to directly innervate the CA (Siegmond and Korge,  
91 2001). These neurons, which seem to highly express a gene encoding the cell adhesion molecule  
92 Fasculin2, are involved in the epithelial movement of male genitalia by inhibiting JH  
93 biosynthesis during the pupal stage (Ádám et al., 2003). All the accumulated evidence together  
94 indicate direct neuronal innervation of the CA to be crucial for regulating JH biosynthesis in the  
95 latter. However, in almost all cases, except Plast-MIP, the neurotransmitter produced in the CA-  
96 projecting neurons has not been clarified. To further understand the neuroendocrine mechanisms

97 of JH biosynthesis in the CA, clarification and characterization of the neurotransmitters would be  
98 crucial.

99 Using *D. melanogaster*, a previous pioneering study had demonstrated that a subset of  
100 neurons producing the neuropeptide hugin (Hug), the invertebrate counterpart of vertebrate  
101 neuromedin U (Meng et al., 2002), extends the axons to the complex formed by the CA and  
102 corpora cardiaca (CC) in the adult insect (Melcher and Pankratz, 2005). However, which  
103 endocrine organ (the CA or CC) the Hug neurons project to still remains unclear. In this study,  
104 we aimed to provide an anatomical evidence of the subset of Hug neurons that directly project  
105 into the CA of *D. melanogaster*. The CA-projecting Hug neurons express a gene encoding the  
106 specific receptor for diuretic hormone 44 (Dh44), namely *Dh44-R2*. The study also showed that  
107 the CA-projecting Hug neurons may have a synaptic connection with the upstream Dh44 neurons.

108

## 109 **Materials and methods**

### 110 ***Drosophila* strains**

111 Flies were reared on 0.275 g agar, 5.0 g glucose, 4.5 g cornmeal, 2.0 g yeast extract, 150 µl  
112 propionic acid, and 175 µl 70% butylparaben (in EtOH) in 50 ml water. All experiments, except  
113 for the temperature shift experiment using *UAS-shibire<sup>ts</sup>*, were conducted at 25 °C under a 12:12-  
114 h light/dark cycle. For the temperature shift experiment, *UAS-shibire<sup>ts</sup>* flies were first reared at  
115 21 °C and transferred to 29 °C within 12 h after eclosion.

116 The following transgenic *D. melanogaster* strains were used in the study: *hug-YFP*  
117 (Melcher and Pankratz, 2005), *R18A04-GAL4* (BDSC #48793), *R65C11-LexA* (BDSC #54089),  
118 *R19D04-GAL4* (BDSC #48847), *hugS3-GAL4* (Melcher and Pankratz, 2005), *Dh44-R2-T2A-*  
119 *GAL4* (Kondo et al., 2020), *PK2-R2-T2A-GAL4* (Kondo et al., 2020), *PK2-R1-2A-GAL4* (BDSC  
120 # 84686), *LexAop-CD4::spGFP11*, *UAS-CD4::spGFP1-10* (BDSC #58755), *LexAop-mCherry*  
121 (BDSC #52272), *UAS-DenMark*, *UAS-Syt1::GFP*; *In(3L)D,mirr,D / TM6C* (BDSC #33064),

122 *UAS-GFP;UAS-mCD8::GFP* (Ito et al., 1998) (a gift from Kei Ito), *UAS-TurboRFP* (a gift from  
123 A. Koto and M. Miura, The University of Tokyo), and *UAS-shibire<sup>ts</sup>* (Kitamoto, 2001) (a gift  
124 from Hiroshi Kohsaka, The University of Tokyo).

125

126 **Generation of guinea pig anti-*Drosophila melanogaster* JH acid O-methyltransferase**  
127 **(JHAMT) antibody**

128 Guinea pig polyclonal anti-*D. melanogaster* JHAMT antibody was raised against the peptide  
129 NH<sub>2</sub>- MNQASLYQHANQVQRHDAK-COOH, which corresponds to 1–19 amino acid residues  
130 of the mature JHAMT protein (Niwa et al., 2008).

131

132 **Immunohistochemistry**

133 Tissues were dissected in phosphate buffer saline (PBS) and fixed in 3.7% formaldehyde in PBS  
134 for 30 to 60 min at room temperature (RT). The fixed samples were washed thrice in PBS, then  
135 washed for 15 min with PBS containing 0.3% Triton X-100 (PBT), and finally treated with the  
136 blocking solution (0.2% bovine serum albumin (Sigma A9647) in PBT) for 1 h at RT or  
137 overnight at 4 °C. Thereafter, the samples were incubated with a primary antibody in the  
138 blocking solution overnight at 4 °C. The primary antibodies used were as follows: mouse anti-  
139 GFP antibody (Sigma G6539, 1:2000); rabbit anti-RFP antibody (Medical & Biological  
140 Laboratories PM005, 1:2,000); rabbit anti-hugin-PK2 antibody (Schoofs et al., 2014) (1:500);  
141 rabbit anti-hugin- $\gamma$  antibody (Schoofs et al., 2014) (1:500); and guinea pig anti-JHAMT antibody  
142 (this study, 1:1000-2000). After washing, the samples were incubated with the fluorophore  
143 (Alexa Fluor 488, 546, or 633)-conjugated secondary antibodies (Thermo Fisher Scientific)  
144 (1:200) in the blocking solution for 2 h at RT or overnight at 4 °C. After another round of  
145 washing, all samples were mounted on the glass slides using FluorSave reagent (Merck Millipore  
146 #345789).

147

## 148 **Quantitative RT-PCR for *Krüppel-homolog 1* (*Kr-h1*) expression**

149 Total RNA was extracted from whole bodies of 4-day-old adult virgin female flies. RNA was  
150 reverse transcribed using ReverTra Ace qPCR RT Master Mix with gDNA remover (TOYOBO)  
151 and cDNA samples were used as templates for quantitative PCR using THUNDERBIRD SYBR  
152 qPCR mix (TOYOBO) on a Thermal Cycler Dice Real Time System (Takara Bio Inc.). The  
153 amount of target RNA was normalized to an endogenous control ribosomal protein 49 gene  
154 (*rp49*), and the relative fold change was calculated. The expression level of *Kr-h1* gene was  
155 compared using the  $\Delta\Delta C_t$  method. The following primers were used for *Kr-h1*, as previously  
156 described (Kang et al., 2017): *kr-h1 F* (5'-TCACACATCAAGAAGCCAACT-3') and *kr-h1 R*  
157 (5'-GCTGGTTGGCGGAATAGTAA-3'). The primers for *rp49* were *rp49 F* (5'-  
158 CGGATCGATATGCTAAGCTGT-3') and *rp49 R* (5'-GCGCTTGTTTCGATCCGTA-3').

159

## 160 **Statistical analysis**

161 Sample sizes were chosen based on the number of independent experiments required for  
162 statistical significance and technical feasibility. The experiments were not randomized, and  
163 investigators were not blinded. All statistical analyses were performed using the “R” software  
164 environment.

165

## 166 **Results**

### 167 **Some of the *Dh44-R2*-expressing neurons project to the corpora allata**

168 This study originally intended to identify candidate neurons projecting to the ring gland (RG),  
169 comprised of the CA, CC, and PG, in *D. melanogaster* larvae, but not in the adult. We first  
170 browsed the large collections of larval images in the FlyLight database of Janelia Research  
171 Campus, Howard Hughes Medical Institute (<https://flyweb.janelia.org/cgi-bin/flew.cgi>). The

172 FlyLight database provides large anatomical image data sets and highly characterized collections  
173 of GAL4 lines that allowed us to visualize individual neurons in the *D. melanogaster* central  
174 nervous system (Jenett et al., 2012). In the FlyLight images of each GAL4 line, fluorescent  
175 proteins driven by the GAL4-UAS system (Brand and Perrimon, 1993) specifically visualize a  
176 subset of larval neurons, whereas many images do not include the RG located on the dorsal side  
177 of the two brain hemispheres. Nevertheless, some of the FlyLight images show neurons that  
178 extend their axons toward the longitudinal fissure of the two brain hemispheres, which are  
179 reminiscent of the axonal morphology of the identified RG-projecting neurons, such as PTHH  
180 neurons (McBrayer et al., 2007; Siegmund and Korge, 2001). Therefore, we expected that  
181 neurons that possess such characteristic axonal morphology are the RG-projecting neurons.  
182 Based on this working hypothesis, we could successfully identify a GAL4 line labeling a subset  
183 of the Crz neurons that projects to the prothoracic gland cells (Imura et al., 2020).

184 During the course of our FlyLight database search, we found not only the *Crz-GAL4* line  
185 projecting to the prothoracic gland but also other GAL4 lines that visualize neuronal processes at  
186 the longitudinal fissure of the two brain hemispheres (E.I, Y.M, Y.K., Y.S.N., R.N.,  
187 unpublished). Next, we obtained the GAL4 lines, and crossed them with *UAS-mCD8::GFP*  
188 strain to examine whether the GFP-labeled neurons project to the RGs in the 3<sup>rd</sup>-instar larvae.  
189 These strains included *R18A04-GAL4*, in which *GAL4* expression was driven by a part of the  
190 enhancer region of the G protein-coupled receptor gene *Dh44-R2* (Figure 1a). We confirmed that  
191 *R18A04-GAL4* was active in neurons projecting to the central region of the RG, which seemed to  
192 correspond to the CA (Figure 1b). To precisely examine whether the *R18A04-GAL4*-positive  
193 neurons projected to the CA, by immunostaining, we generated a new guinea pig antibody  
194 against JHAMT protein (Niwa et al., 2008). We found GFP signals in *R18A04-*  
195 *GAL4>mCD8::GFP* larvae to be observable in the neurite terminals located at the CA, which  
196 was JHAMT-positive (Figure 1b).



197 Notably, we found the projection of *R18A04-GAL4*-positive neurons to the CA to be  
198 observable in the adult stage (Figure 1c). Till date, CA-projecting neurons had not been  
199 identified and characterized in adult *D. melanogaster*. On the other hand, many recent studies  
200 have reported JH biosynthesis to be adaptively regulated in response to internal physiological  
201 conditions and external environmental cues in adult *D. melanogaster* (Lee et al., 2017;  
202 Meiselman et al., 2017; Ojima et al., 2018; Reiff et al., 2015; Wu et al., 2018; Yamamoto et al.,  
203 2013). Therefore, we decided to focus on the anatomical characteristics of *R18A04-GAL4*-  
204 positive neurons in the adult stage.

205 Since the expression of *R18A04-GAL4* is regulated by the enhancer region of *Dh44-R2*,  
206 we expected the *R18A04-GAL4*-positive CA-projecting neurons to express *Dh44-R2* gene. To  
207 test this idea, we used the *Dh44-R2* knock-in T2A-GAL4 line (Kondo et al., 2020), and found a  
208 group of neurite termini, labeled with GFP of *Dh44-R2-T2A-GAL4>UAS-mCD8::GFP*, to be  
209 located at the CA in the adult stage (Figure 1d). These results clearly suggested that neurons  
210 expressing *Dh44-R2* project to the CA.

211 Since Dh44-R2 is a receptor for the neuropeptide Dh44, CA-projecting *Dh44-R2*-  
212 expressing neurons might receive a neuronal input from Dh44 neurons. To confirm the  
213 anatomical relationship of the ligand-expressing neurons with receptor-expressing neurons, we  
214 performed co-labeling experiment using *R65C11-LexA* and *R18A04-GAL4*. Since *R65C11-LexA*  
215 is a fly strain that expresses *LexA* transgene under control of *Dh44* promoter, hereafter, we refer  
216 to *R65C11-LexA* as *Dh44-LexA*. We found both *Dh44-LexA*-labeled and *R18A04-GAL4*-labeled  
217 neurites to be in close proximity in the SEZ of the adult brain (Figure 2a). The GFP  
218 Reconstitution Across Synaptic Partners (GRASP) method (Feinberg et al., 2008) was used to  
219 confirm whether the neurons were close enough in proximity to form synapses. As expected, we  
220 observed reconstituted GFP fluorescence at the sites where neurites were observed (Figure 2a,b).

221 These results suggested that the CA-projecting *Dh44-R2*-expressing neurons have direct synaptic  
222 contact with the upstream Dh44 neurons.

223

224 **The corpora allata-projecting *Dh44-R2*-expressing neurons produce the neuropeptide**  
225 **hugin**

226 We next investigated which neurotransmitter is utilized in the CA-projecting *Dh44-R2*-  
227 expressing neurons. For this analysis, we focused on a subset of neurons producing the  
228 neuropeptide Hug, which is synthesized in approximately 20 neurons, whose cell bodies are  
229 located in the SEZ of the *D. melanogaster* brain (Melcher and Pankratz, 2005; Meng et al., 2002).  
230 Previous studies had reported that there are several clusters of Hug neurons, each of which  
231 projects to various regions, including not only the pars intercerebralis and ventral nerve cord but  
232 also the CC-CA complex in the adults (King et al., 2017; Melcher and Pankratz, 2005). However,  
233 the previous study had not clarified which endocrine organs the Hug neurons project to, the CA  
234 or CC. Through our anatomical analysis of *R18A04-GAL4* and *Dh44-R2-T2A-GAL4* flies, we  
235 hypothesized that overall morphology of the CA-projecting *Dh44-R2*-expressing neurons is  
236 similar to that of the CA-projecting Hug neurons. To test this hypothesis, we simultaneously  
237 labeled both *Dh44-R2*-expressing neurons and Hug neurons with *R18A04-GAL4*- or *Dh44-R2*-  
238 *T2A-GAL4*-driven red fluorescence protein (RFP) and *hug* promoter-driven yellow fluorescence  
239 protein (YFP), respectively. We found that, with either of *R18A04-GAL4* or *Dh44-R2-T2A-GAL4*,  
240 GAL4-driven RFP signal was observed in the cell bodies of *hug*-promoter-driven YFP signal  
241 (Figure 3a,c). Moreover, we observed both YFP and RFP signals in the identical axon terminals  
242 located on the CA (Figure 3b,d). Together, the results suggest that the CA-projecting *Dh44-R2*-  
243 expressing neurons are indeed Hug-positive.

244 To confirm whether the Dh44 neurons are located upstream of the Hug neurons, we  
245 performed the same experiments as in Fig. 2 using *Dh44-LexA* along with *hugS3-GAL4* strain, in

246 which *GAL4* is expressed downstream of the *hug* promoter (Melcher and Pankratz, 2005). We  
247 found the neurites of Hug neurons labeled with *hugS3-GAL4* to be closely located to those of the  
248 Dh44 neurons labeled with *Dh44-LexA* (Figure 3e). Furthermore, GRASP experiments showed a  
249 reconstituted GFP fluorescence at the sites where both Hug and Dh44 neurites were observed  
250 (Figure 3f). The results, therefore, suggest that the CA-projecting Hug neurons have direct  
251 synaptic contact with the upstream Dh44 neurons.

252

253 **The corpora allata-projecting hugin neurons may be dispensable for juvenile hormone**  
254 **biosynthesis**

255 As shown above, *R18A04-GAL4* line was active in at least 14 Hug neurons in the SEZ (Figure  
256 3a). Given the fact that Hug neurons divide into multiple subpopulations that project to distinct  
257 regions (Schlegel et al., 2016), we expected a few, not all, of these Hug neurons to project to the  
258 CA. This expectation was supported by our anatomical observation using another *GAL4* line that  
259 we identified during our FlyLight image screen, namely *R37F05-GAL4*, which is under the  
260 control of a small enhancer region of retinal degeneration A gene. We found that, while *R37F05-*  
261 *GAL4* was active in several neurons, only 2 pairs of the neurons were merged with *hug*  
262 promoter-driven fluorescence signal (Figure 4a). Importantly, morphology of the *R37F05-GAL4*  
263 neurite termini on the CA was identical to that of the CA-projecting Hug neurons (Figure 4b).  
264 Moreover, *R37F05-GAL4*-driven synaptotagmin-GFP (*Syt1::GFP*), a synaptic vesicle marker,  
265 was observed on the CA while *R37F05-GAL4*-driven dendritic marker DenMark was not (Figure  
266 4c). These results strongly suggest that only the 2 pairs of Hug neurons, not the rest, project to  
267 the CA in adults.

268 Further, we realized by chance that another *GAL4* line, namely *R19D04-GAL4*, which is  
269 under the control of a small enhancer region of *asense* gene, also labeled the 2 pairs of CA-  
270 projecting Hug neurons in the adult (Figure 4d) while we did not focus on *R19D04-GAL4* line at

271 our initial FlyLight image screen. We confirmed that *R19D04-GAL4*-positive neurons indeed  
272 project to the CA (Figure 4e).

273 Since *R19D04-GAL4* is active in fewer neurons than other *GAL4* lines used in this study,  
274 we utilized *R19D04-GAL4* to manipulate neuronal activity of the CA-projecting Hug neurons in  
275 the following experiment. We expressed the gene encoding temperature-sensitive dynamin  
276 (*shibire<sup>ts</sup>*) specifically in the CA-projecting Hug neurons and inhibited their neuronal activity  
277 specifically in the adult stage at a restrictive temperature (Kitamoto, 2001). We collected mRNA  
278 from these flies and examined expression of the *Kr-hl* gene; *Kr-hl* is well known as a  
279 downstream target of JH receptors and its expression level correlates well with hemolymph JH  
280 titer level (Minakuchi et al., 2009). However, we found the inhibition of CA-projecting Hug  
281 neurons to not significantly alter *Kr-hl* expression compared to that in the controls (Figure 5a).

282 We also took another approach to examine whether Hug signaling is involved in the  
283 regulation of JH biosynthesis in the CA. A previous study had identified 2 specific receptors for  
284 Hug, namely Pyrokinin 2 Receptor 1 (PK2-R1) and Pyrokinin 2 Receptor 2 (PK2-R2) (Park et al.,  
285 2002). To examine whether these receptors are expressed in the CAs, we performed cell-specific  
286 labeling using *PK2-R1-T2A-GAL4* and *PK2-R2-T2A-GAL4* lines. However, we could not  
287 observe any significant *T2A-GAL4*-driven GFP fluorescence signal in the CA (Figure 5b,c). In  
288 conjunction with our observation regarding *Kr-hl* expression (Figure 5a), these results suggested  
289 the CA-projecting Hug neurons to be dispensable for JH biosynthesis; they may rather play a  
290 role in systemic function of *D. melanogaster*, which will be discussed later.

291

## 292 **Discussion**

293 In this study, we anatomically characterized the CA-projecting Hug neurons in *D. melanogaster*.  
294 Hug was originally identified as a myostimulatory and ecdysis-modifying neuropeptide (Meng et  
295 al., 2002); further studies have demonstrated that it plays a central role in integrating external

296 and internal feeding-relevant information to control feeding behavior (Bader et al., 2007;  
297 Hückesfeld et al., 2016; Melcher and Pankratz, 2005; Melcher et al., 2006; Melcher et al., 2007;  
298 Schoofs et al., 2014; Surendran et al., 2017). More recently, Hug has been found to regulate  
299 circadian rhythm in *D. melanogaster* (King et al., 2017). To understand the role of Hug in *D.*  
300 *melanogaster* physiology and behavior, neuronal circuits and synaptic connections of Hug  
301 neurons have been intensively studied (Bader et al., 2007; Melcher and Pankratz, 2005; Schlegel  
302 et al., 2016). Regarding the anatomical relationship between Hug neurons and the CA, the former  
303 have been reported to project to the complex including the CA and CC in the adult stage  
304 (Melcher and Pankratz, 2005), and to the CC in the larval stage (Hückesfeld et al., 2020).  
305 However, these studies have not precisely examined whether a part of Hug neurons project to the  
306 CA. To the best of our knowledge, this is the first study to identify a specific neurotransmitter  
307 that is produced in the CA-projecting neurons of *D. melanogaster*, and to anatomically  
308 characterize a neuronal relay to the CA-projecting neurons from the upstream interneurons.

309         Based on our anatomical observation, we expected the CA-projecting Hug neurons to be  
310 involved in the regulation of JH biosynthesis in the CA. However, our genetic analysis till date  
311 has not validated this expectation. Particularly, to our surprise, either of the 2 identified Hug  
312 receptor genes, *PK2-R1* and *PK2-R2*, appeared not to be expressed in the CA. Although it has  
313 been reported that another receptor called PK1-R is potentially activated by Hug in a  
314 heterologous cell culture experiment (Cazzamali et al., 2005), the half-maximal effective  
315 concentration of hug for PK1-R is more than 10  $\mu$ M (Park et al., 2002). Therefore, we have not  
316 examined the involvement of PK1-R in this study. Alternatively, an unknown Hug receptor may  
317 still possibly exist and its gene expressed in the CA. Nevertheless, our data implied that Hug  
318 released from the CA-projecting Hug neurons is not locally received by the CA cells, and rather  
319 received by other tissues apart from the CA. In this scenario, the CA-projecting Hug neurons  
320 would secrete Hug from the synaptic termini on the CA to hemolymph. Such systemic release of

321 neuropeptides from the CA is already known in the silkworm *Bombyx mori*, since *B. mori* PTTH  
322 neurons project to the CA instead of the PG, and the secreted PTTH from the CA is circulated in  
323 the hemolymph and then received by the PG cells (Mizoguchi et al., 1990). Whether the CA-  
324 projecting neuron-derived Hug is released to hemolymph and, if so, how essential the secreted  
325 Hug is for regulating *D. melanogaster* biological functions, other than JH biosynthesis, would be  
326 worth investigating.

327         Our current data suggest that the CA-projecting Hug neurons have synaptic connections  
328 with the upstream Dh44 neurons. Dh44 is a crucial neuropeptide that regulates the rest:activity  
329 rhythms and sleep in *D. melanogaster* (Cavanaugh et al., 2014). In addition, Dh44 receptor 1  
330 (*Dh44-R1*), though not *Dh44-R2*, is involved in the regulation of circadian locomotor activity  
331 and is expressed in Hug neurons in the SEZ of *D. melanogaster* (King et al., 2017). Therefore, it  
332 is feasible to think that, analogous to the neuronal relay from the Dh44 neurons to *Dh44-R1*-  
333 expressing neurons, *Dh44-R2*-expressing neurons might be involved in the regulation of  
334 circadian rhythms and/or sleep. Of note, JH is involved in the regulation of sleep behavior in *D.*  
335 *melanogaster* (Wu et al., 2018) and of circadian rhythms in the bumble bee *Bombus terrestris*  
336 (Pandey et al., 2020). Alternatively, since Dh44 neurons are also important for the sensing  
337 mechanisms of dietary sugar and amino acids (Dus et al., 2015; Yang et al., 2018), the CA-  
338 projecting Hug neurons might play a role in nutritional sensing and metabolism. JH biosynthesis  
339 has also been suggested to be dependent on the nutritional status of some insects (Badisco et al.,  
340 2013).

341         We should also note that the CA-projecting Hug neurons that we identified might be  
342 different from the previously identified CA-projecting neurons, namely CA-LP1 and CA-LP2, in  
343 *D. melanogaster* (Siegmund and Korge, 2001). While the cell bodies of the CA-projecting Hug  
344 neurons are located in the SEZ, those of CA-LP1 and CA-LP2 are placed in the lateral  
345 protocerebrum (Siegmund and Korge, 2001). Although the role of CA-LP1 and/or CA-LP2

346 might suppress JH biosynthesis in the CA to regulate epithelial morphogenesis of male genitalia  
347 during pupal stage (Ádám et al., 2003), which neurotransmitters are produced in CA-LP1 and  
348 CA-LP2 have not been elucidated yet. In future, identities of these CA-projecting neurons should  
349 be analyzed, and the functional relationship across CA-LP1, CA-LP2, and Hug neurons should  
350 be investigated to understand the molecular and neuronal mechanisms of JH biosynthesis.

351

### 352 **Competing interests**

353 The authors declare that the research was conducted in the absence of any commercial or  
354 financial relationships that could be construed as a potential conflict of interest.

355

### 356 **Acknowledgements**

357 We thank Kei Ito, Hiroshi Kohsaka, Akiko Koto, Masayuki Miura, the Bloomington Stock  
358 Center, the Kyoto Stock Center (DGRC), the National Institute of Genetics, the Vienna  
359 Drosophila Resource Center, and the Developmental Studies Hybridoma Bank for providing all  
360 stocks and reagents. We would like to thank Editage ([www.editage.com](http://www.editage.com)) for English language  
361 editing. E.I. was a recipient of fellowship from the Japan Society for the Promotion of Science.  
362 This work was supported by grants from PRESTO of Japan Science and Technology Agency to  
363 R.N., from Japan Society for the Promotion of Science KAKENHI 17J00218 to E.I., KAKENHI  
364 26250001 to H.T., and A17H01378 to H.T., and from the Tomizawa Jun-ichi & Keiko Fund of  
365 Molecular Biology Society of Japan for Young Scientist to Y.S.N.

366

### 367 **References**

368 Ádám, G., Perrimon, N. & Noselli, S. (2003). The retinoic-like juvenile hormone controls the  
369 looping of left-right asymmetric organs in *Drosophila*. *Development*, 130, 2397–2406.



- 370 Bader, R., Colomb, J., Pankratz, B., Schröck, A., Stocker, R. F. & Pankratz, M. J. (2007).  
371 Genetic dissection of neural circuit anatomy underlying feeding behavior in *Drosophila*:  
372 Distinct classes of hugin-expressing neurons. *Journal of Comparative Neurology*, 502, 848–  
373 856.
- 374 Badisco, L., Van Wielendaele, P. V. & Broeck, J. Vanden (2013). Eat to reproduce: A key role  
375 for the insulin signaling pathway in adult insects. *Frontiers in Physiology*, 4, 202.
- 376 Brand, A. H. & Perrimon, N. (1993). Targeted gene expression as a means of altering cell fates  
377 and generating dominant phenotypes. *Development*, 118, 401–415.
- 378 Cavanaugh, D. J., Geratowski, J. D., Wooldorton, J. R. A., Spaethling, J. M., Hector, C. E.,  
379 Zheng, X., ... Sehgal, A. (2014). Identification of a circadian output circuit for rest: Activity  
380 rhythms in *Drosophila*. *Cell*, 157, 689–701.
- 381 Cazzamali, G., Torp, M., Hauser, F., Williamson, M. & Grimmelikhuijzen, C. J. P. (2005). The  
382 *Drosophila* gene CG9918 codes for a pyrokinin-1 receptor. *Biochemical and Biophysical*  
383 *Research Communications*, 335, 14–19.
- 384 Chiang, A. S., Tsai, W. H. & Schal, C. (1995). Neural and hormonal regulation of growth of  
385 corpora allata in the cockroach, *Diploptera punctata*. *Molecular and Cellular Endocrinology*,  
386 115, 51–57.
- 387 Dus, M., Lai, J. S. Y., Gunapala, K. M., Min, S., Tayler, T. D., Hergarden, A. C., ... Suh, G. S. B.  
388 (2015). Nutrient Sensor in the Brain Directs the Action of the Brain-Gut Axis in *Drosophila*.  
389 *Neuron*, 87, 139–151.
- 390 Feinberg, E. H., VanHoven, M. K., Bendesky, A., Wang, G., Fetter, R. D., Shen, K. & Bargmann,  
391 C. I. (2008). GFP Reconstitution Across Synaptic Partners (GRASP) Defines Cell Contacts  
392 and Synapses in Living Nervous Systems. *Neuron*, 57, 353–363.



- 393 Hasegawa, T., Hasebe, M. & Shiga, S. (2020). Immunohistochemical and Direct Mass Spectral  
394 Analyses of *Plautia stali* Myoinhibitory Peptides in the Cephalic Ganglia of the Brown-  
395 Winged Green Bug *Plautia stali*. *Zoological Science*, 37, 42–49.
- 396 Hückesfeld, S., Peters, M. & Pankratz, M. J. (2016). Central relay of bitter taste to the  
397 protocerebrum by peptidergic interneurons in the *Drosophila* brain. *Nature Communications*,  
398 7, 12796.
- 399 Hückesfeld, S., Schlegel, P., Miroschnikow, A., Schoofs, A., Zinke, I., Haubrich, A. N.,  
400 ...Pankratz, M. J. (2020). Unveiling the sensory and interneuronal pathways of the  
401 neuroendocrine connectome in *Drosophila*. *bioRxiv*, DOI: 10.1101/2020.10.22.350306.
- 402 Imura, E., Shimada-Niwa, Y., Nishimura, T., Hückesfeld, S., Schlegel, P., Ohhara, Y., ... Niwa,  
403 R. (2020). The Corazonin-PTTH Neuronal Axis Controls Systemic Body Growth by  
404 Regulating Basal Ecdysteroid Biosynthesis in *Drosophila melanogaster*. *Current Biology*,  
405 30, 2156-2165.e5.
- 406 Ito, K., Suzuki, K., Estes, P., Ramaswami, M., Yamamoto, D. & Strausfeld, N. J. (1998). The  
407 organization of extrinsic neurons and their implications in the functional roles of the  
408 mushroom bodies in *Drosophila melanogaster* Meigen. *Learning and Memory*, 5, 52–77.
- 409 Jenett, A., Rubin, G. M., Ngo, T. T. B., Shepherd, D., Murphy, C., Dionne, H., ... Zugates, C. T.  
410 (2012). A GAL4-Driver Line Resource for *Drosophila* Neurobiology. *Cell Reports*, 2, 991–  
411 1001.
- 412 Kang P., Chang K., Liu Y., Bouska M., Birnbaum A., Karashchuk G., ... Bai H.  
413 (2017). *Drosophila* Kruppel homolog 1 represses lipolysis through interaction with dFOXO.  
414 *Scientific Reports*, 7, 16369.
- 415 Kannangara, J. R., Mirth, C. K. & Warr, C. G. (2021). Regulation of ecdysone production in  
416 *Drosophila* by neuropeptides and peptide hormones. *Open Biology*, 11, 200373.

- 417 King, A. N., Barber, A. F., Smith, A. E., Dreyer, A. P., Sitaraman, D., Nitabach, M. N., ...  
418 Sehgal, A. (2017). A Peptidergic Circuit Links the Circadian Clock to Locomotor Activity.  
419 *Current Biology*, 27, 1915–1927.
- 420 Kitamoto, T. (2001). Conditional modification of behavior in *Drosophila* by targeted expression  
421 of a temperature-sensitive *shibire* allele in defined neurons. *Journal of Neurobiology*, 47,  
422 81–92.
- 423 Kondo, S., Takahashi, T., Yamagata, N., Imanishi, Y., Katow, H., Hiramatsu, S., ... Tanimoto, H.  
424 (2020). Neurochemical Organization of the *Drosophila* Brain Visualized by Endogenously  
425 Tagged Neurotransmitter Receptors. *Cell Reports*, 30, 284–297.
- 426 Lee, S. S., Ding, Y., Karapetians, N., Rivera-Perez, C., Noriega, F. G. & Adams, M. E. (2017).  
427 Hormonal Signaling Cascade during an Early-Adult Critical Period Required for Courtship  
428 Memory Retention in *Drosophila*. *Current Biology*, 27, 2798–2809.
- 429 Malita, A. & Rewitz, K. (2021). Interorgan communication in the control of metamorphosis.  
430 *Current Opinion in Insect Science*, 43, 54–62.
- 431 Martín, D., Chafino, S. & Franch-Marro, X. (2021). How stage identity is established in insects:  
432 the role of the Metamorphic Gene Network. *Current Opinion in Insect Science*, 43, 29–38.
- 433 Matsumoto, K., Numata, H. & Shiga, S. (2013). Role of the brain in photoperiodic regulation of  
434 juvenile hormone biosynthesis in the brown-winged green bug *Plautia stali*. *Journal of*  
435 *Insect Physiology*, 59, 387–393.
- 436 Matsumoto, K., Suetsugu, Y., Tanaka, Y., Kotaki, T., Goto, S. G., Shinoda, T. & Shiga, S.  
437 (2017). Identification of allatostatins in the brown-winged green bug *Plautia stali*. *Journal*  
438 *of Insect Physiology*, 96, 21–28.
- 439 McBrayer, Z., Ono, H., Shimell, M. J., Parvy, J. P., Beckstead, R. B., Warren, J. T., ...  
440 O'Connor, M. B. (2007). Prothoracicotropic Hormone Regulates Developmental Timing  
441 and Body Size in *Drosophila*. *Developmental Cell*, 13, 857–871.

- 442 Meiselman, M., Lee, S. S., Tran, R. T., Dai, H., Ding, Y., Rivera-Perez, C., ... Adams, M. E.  
443 (2017). Endocrine network essential for reproductive success in *Drosophila melanogaster*.  
444 *Proceedings of National Academy of Science of the United States of America*, 114, E3849–  
445 E3858.
- 446 Melcher, C. & Pankratz, M. J. (2005). Candidate Gustatory Interneurons Modulating Feeding  
447 Behavior in the *Drosophila* Brain. *PLOS Biology*, 3, e305.
- 448 Melcher, C., Bader, R., Walther, S., Simakov, O. & Pankratz, M. J. (2006). Neuromedin U and  
449 its putative *Drosophila* homolog hugin. *PLOS Biology*, 4, e68.
- 450 Melcher, C., Bader, R. & Pankratz, M. J. (2007). Amino acids, taste circuits, and feeding  
451 behavior in *Drosophila*: Towards understanding the psychology of feeding in flies and man.  
452 *Journal of Endocrinology*, 192, 467–472.
- 453 Meng, X., Wahlström, G., Immonen, T., Kolmer, M., Tirronen, M., Predel, R., ... Roos, C.  
454 (2002). The *Drosophila* hugin gene codes for myostimulatory and ecdysis-modifying  
455 neuropeptides. *Mechanisms of Development*, 117, 5–13.
- 456 Minakuchi, C., Namiki, T. & Shinoda, T. (2009). Krüppel homolog 1, an early juvenile  
457 hormone-response gene downstream of Methoprene-tolerant, mediates its anti-metamorphic  
458 action in the red flour beetle *Tribolium castaneum*. *Developmental Biology*, 325, 341–350.
- 459 Mizoguchi, A., Oka, T., Kataoka, H., Nagasawa, H., Suzuki, A. & Ishizaki, H. (1990).  
460 Immunohistochemical Localization of Prothoracicotropic Hormone-Producing  
461 Neurosecretory Cells in the Brain of *Bombyx mori*. *Development, Growth, and*  
462 *Differentiation*, 32, 591–598.
- 463 Niwa, R. & Niwa, Y. S. (2014a). Enzymes for ecdysteroid biosynthesis: their biological  
464 functions in insects and beyond. *Bioscience, Biotechnology, and Biochemistry*, 78, 1283–  
465 1292.

- 466 Niwa, Y. S. and Niwa, R. (2014b). Neural control of steroid hormone biosynthesis during  
467 development in the fruit fly *Drosophila melanogaster*. *Genes and Genetic Systems*, 89, 27–  
468 34.
- 469 Niwa, R., Niimi, T., Honda, N., Yoshiyama, M., Itoyama, K., Kataoka, H. & Shinoda, T. (2008).  
470 Juvenile hormone acid O-methyltransferase in *Drosophila melanogaster*. *Insect*  
471 *Biochemistry and Molecular Biology*, 38, 714–720.
- 472 Ojima, N., Hara, Y., Ito, H. & Yamamoto, D. (2018). Genetic dissection of stress-induced  
473 reproductive arrest in *Drosophila melanogaster* females. *PLOS Genetics*, 14, e1007434.
- 474 Pan, X., Connacher, R. P. & O'Connor, M. B. (2020). Control of the insect metamorphic  
475 transition by ecdysteroid production and secretion. *Current Opinion in Insect Science*, 43,  
476 11–20.
- 477 Pandey, A., Motro, U. & Bloch, G. (2020). Juvenile hormone affects the development and  
478 strength of circadian rhythms in young bumble bee (*Bombus terrestris*) workers.  
479 *Neurobiology of Sleep and Circadian Rhythms*, 9, 100056.
- 480 Park, Y., Kim, Y. J. & Adams, M. E. (2002). Identification of G protein-coupled receptors for  
481 *Drosophila* PRXamide peptides, CCAP, corazonin, and AKH supports a theory of ligand-  
482 receptor coevolution. *Proceedings of National Academy of Science of the United States of*  
483 *America*. 99, 11423–11428.
- 484 Reiff, T., Jacobson, J., Cognigni, P., Antonello, Z., Ballesta, E., Tan, K. J., ... Miguel-Aliaga, I.  
485 (2015). Endocrine remodelling of the adult intestine sustains reproduction in *Drosophila*.  
486 *Elife*, 4, e06930.
- 487 Riddiford, L. M. (2020). Rhodnius, Golden Oil, and Met: A History of Juvenile Hormone  
488 Research. *Frontiers in Cell and Developmental Biology*, 8, 679.

- 489 Schlegel, P., Texada, M. J., Miroschnikow, A., Schoofs, A., Hückesfeld, S., Peters, M., ...  
490 Pankratz, M. J. (2016). Synaptic transmission parallels neuromodulation in a central food-  
491 intake circuit. *Elife*, 5, e16799.
- 492 Schmidt-Nielsen, K. (1997). *Animal Physiology: Adaptation and Environment*. 5th Edition.  
493 Cambridge: Cambridge University Press.
- 494 Schoofs, A., Hückesfeld, S., Schlegel, P., Miroschnikow, A., Peters, M., Zeymer, M., ...  
495 Pankratz, M. J. (2014). Selection of Motor Programs for Suppressing Food Intake and  
496 Inducing Locomotion in the *Drosophila* Brain. *PLOS Biology*, 12, e1001893.
- 497 Shiga, S., Hamanaka, Y., Tatsu, Y., Okuda, T. & Numata, H. (2003). Juvenile Hormone  
498 Biosynthesis in Diapause and Nondiapause Females of the Adult Blow Fly *Protophormia*  
499 *terraenovae*. *Zoological Science*, 20, 1199–1206.
- 500 Shimada-Niwa, Y. & Niwa, R. (2014). Serotonergic neurons respond to nutrients and regulate  
501 the timing of steroid hormone biosynthesis in *Drosophila*. *Nature Communications*, 5, 5778.
- 502 Shimell, M. J., Pan, X., Martin, F. A., Ghosh, A. C., Leopold, P., O'Connor, M. B. & Romero, N.  
503 M. (2018). Prothoracicotropic hormone modulates environmental adaptive plasticity  
504 through the control of developmental timing. *Development*, 145, dev159699.
- 505 Siegmund, T. & Korge, G. (2001). Innervation of the ring gland of *drosophila melanogaster*.  
506 *Journal of Comparative Neurology*, 431, 481–491.
- 507 Surendran, S., Hückesfeld, S., Wäschle, B. & Pankratz, M. J. (2017). Pathogen-induced food  
508 evasion behavior in *Drosophila* larvae. *Journal of Experimental Biology*, 220, 1774–1780.
- 509 Virant-Doberlet, M., Horseman, G., Loher, W. & Huber, F. (1994). Neurons projecting from the  
510 brain to the corpora allata in orthopteroid insects: anatomy and physiology. *Cell and Tissue*  
511 *Research*, 277, 39–50.

- 512 Wu, B., Ma, L., Zhang, E., Du, J., Liu, S., Price, J., Li, S. & Zhao, Z. (2018). Sexual dimorphism  
513 of sleep regulated by juvenile hormone signaling in *Drosophila*. *PLOS Genetics*, 14,  
514 e1007318.
- 515 Yamamoto, R., Bai, H., Dolezal, A. G., Amdam, G. & Tatar, M. (2013). Juvenile hormone  
516 regulation of *Drosophila* aging. *BMC Biology*, 11, 85.
- 517 Yang, Z., Huang, R., Fu, X., Wang, G., Qi, W., Mao, D., ... Wang, L. (2018). A post-ingestive  
518 amino acid sensor promotes food consumption in *Drosophila*. *Cell Research*, 28, 1013–  
519 1025.
- 520
- 521

522 **Figure legends**

523 **Figure 1**

524 *Dh44-R2*-expressing neurons project to the CA. (a) The enhancer region of *R18A04-GAL4* and  
525 the construct of *Dh44-R2-T2A-GAL4*. Gray, blue, magenta, and green boxes indicate the  
526 untranslated region, coding sequence, T2A peptide sequence, and *GAL4* sequence, respectively.  
527 (b) The brain-RG complex (left) and the RG (right) of *R18A04-GAL4; UAS-GFP, UAS-*  
528 *mCD8::GFP* in the 3<sup>rd</sup>-instar larval stage. Scale bar, 50  $\mu\text{m}$  (left), 25  $\mu\text{m}$  (right). (c) *R18A04-*  
529 *GAL4*-positive neurons project to the CA in the adult stage. The brain-proventriculus (PV)  
530 complex (left) and the CA (right). Scale bar, 100  $\mu\text{m}$  (left), 25  $\mu\text{m}$  (right). (d) *Dh44-R2-T2A-*  
531 *GAL4*-positive neurons project to the CA. The brain-PV complex (left) and the CA (right). Scale  
532 bar, 100  $\mu\text{m}$  (left), 25  $\mu\text{m}$  (right).

533

534 **Figure 2**

535 *Dh44* neurons and *Dh44-R2* neurons have synaptic contact. (a) *Dh44-R2* neurons are adjacent to  
536 *Dh44* neurons. Left: Co-staining of *Dh44* neurons (magenta) and *Dh44-R2* neurons (green).  
537 Scale bar, 25  $\mu\text{m}$ . Right: Schematic diagram showing the cell bodies and neurites of *Dh44*  
538 neurons (magenta) and *Dh44-R2* neurons (green). (b) In GRASP analysis, *spGFP1-10::CD4* was  
539 expressed by *R18A04-GAL4*, and *spGFP11::CD4* was expressed by *R65C11-LexA* (middle  
540 panel). GRASP signal was detected between *Dh44-R2* neurons and *Dh44* neurons (arrow). In  
541 contrast, negative controls did not give signals, as shown in left and right panels. Scale bar, 25  
542  $\mu\text{m}$ .

543

544 **Figure 3**

545 The CA-projecting *Dh44-R2*-expressing neurons produce Hug. (a) *R18A04-GAL4; UAS-*  
546 *TurboRFP* signals (magenta) are detected in the cell bodies of Hug neurons (green). Scale bar,

547 25  $\mu\text{m}$ . (b) RFP signals reflecting *R18A04-GAL4* expression are merged with Hug-YFP signals  
548 (green) in the axon terminals. Scale bar, 10  $\mu\text{m}$ . (c) *Dh44-R2-T2A-GAL4; UAS-TurboRFP* signals  
549 (magenta) are detected in the cell bodies of Hug neurons (green). Scale bar, 25  $\mu\text{m}$ . (d) RFP  
550 signals reflecting *Dh44-R2* expression are merged with Hug-YFP signals (green) in the axon  
551 terminals. Scale bar, 10  $\mu\text{m}$ . (e) Hug neurons are adjacent to Dh44 neurons. Left: Co-staining of  
552 Dh44 neurons (magenta) and Hug neurons (green). Scale bar, 25  $\mu\text{m}$ . Right: Schematic diagram  
553 showing the cell bodies and neurites of Dh44 neurons (magenta) and Hug neurons (green). (f) In  
554 GRASP analysis, *spGFP1-10::CD4* was expressed by *hugS3-GAL4*, and *spGFP11::CD4* was  
555 expressed by *R65C11-LexA* (middle panel). GRASP signal was detected between Hug neurons  
556 and Dh44 neurons (green, arrow). In contrast, negative controls did not give signals, as shown in  
557 left and right panels. Scale bar, 25  $\mu\text{m}$ .

558

#### 559 **Figure 4**

560 Two pairs of Hug neurons project to the CA. (a) *R37F05-GAL4; UAS-TurboRFP* signals  
561 (magenta) are detected in the cell bodies of Hug neurons (green). Scale bar, 25  $\mu\text{m}$ . (b) RFP  
562 signals reflecting *R37F05-GAL4* expression are merged with Hug-YFP signals (green) in the  
563 axon terminals. Scale bar, 10  $\mu\text{m}$ . (c) A synaptic vesicle marker *Syt1::GFP*, but not a dendritic  
564 marker *DenMark*, was observed on the CA. *Syt1::GFP* and *DenMark* were expressed by  
565 *R37F05-GAL4*. Scale bar, 25  $\mu\text{m}$ . (d) Cell bodies of the CA-projecting Hug neurons are  
566 overlapped with those of *R19D04-GAL4*-positive neurons. Scale bar, 25  $\mu\text{m}$ . (e) *R19D04-GAL4;*  
567 *UAS-GFP*, and *UAS-mCD8::GFP* neurons (green) are merged with Hug neurons (magenta).  
568 Anti-Hug antibody labeled not only the CA-projecting neurons but also neurons projecting to  
569 regions other than the CA (arrowhead). Scale bar, 10  $\mu\text{m}$ .

570

#### 571 **Figure 5**



572 The CA-projecting Hug neurons might not be required for JH biosynthesis. (a) The *shibire<sup>ts</sup>*-  
573 mediated neuronal inhibition of CA-projecting Hug neurons could not change the expression  
574 level of *Kr-h1*. Student's *t*-test with Bonferoni's collection was used for this data. \*\*\* $p \leq 0.001$ ,  
575 \*\* $p \leq 0.01$ , and \* $p \leq 0.05$ ; n.s., non-significant ( $p > 0.05$ ). (b, c) GFP signals reflecting *PK2-R1*  
576 (b) and *PK2-R2* (c) expression are not detected in the CA. Scale bar, 25  $\mu\text{m}$ .



# Fig. 1

(a)

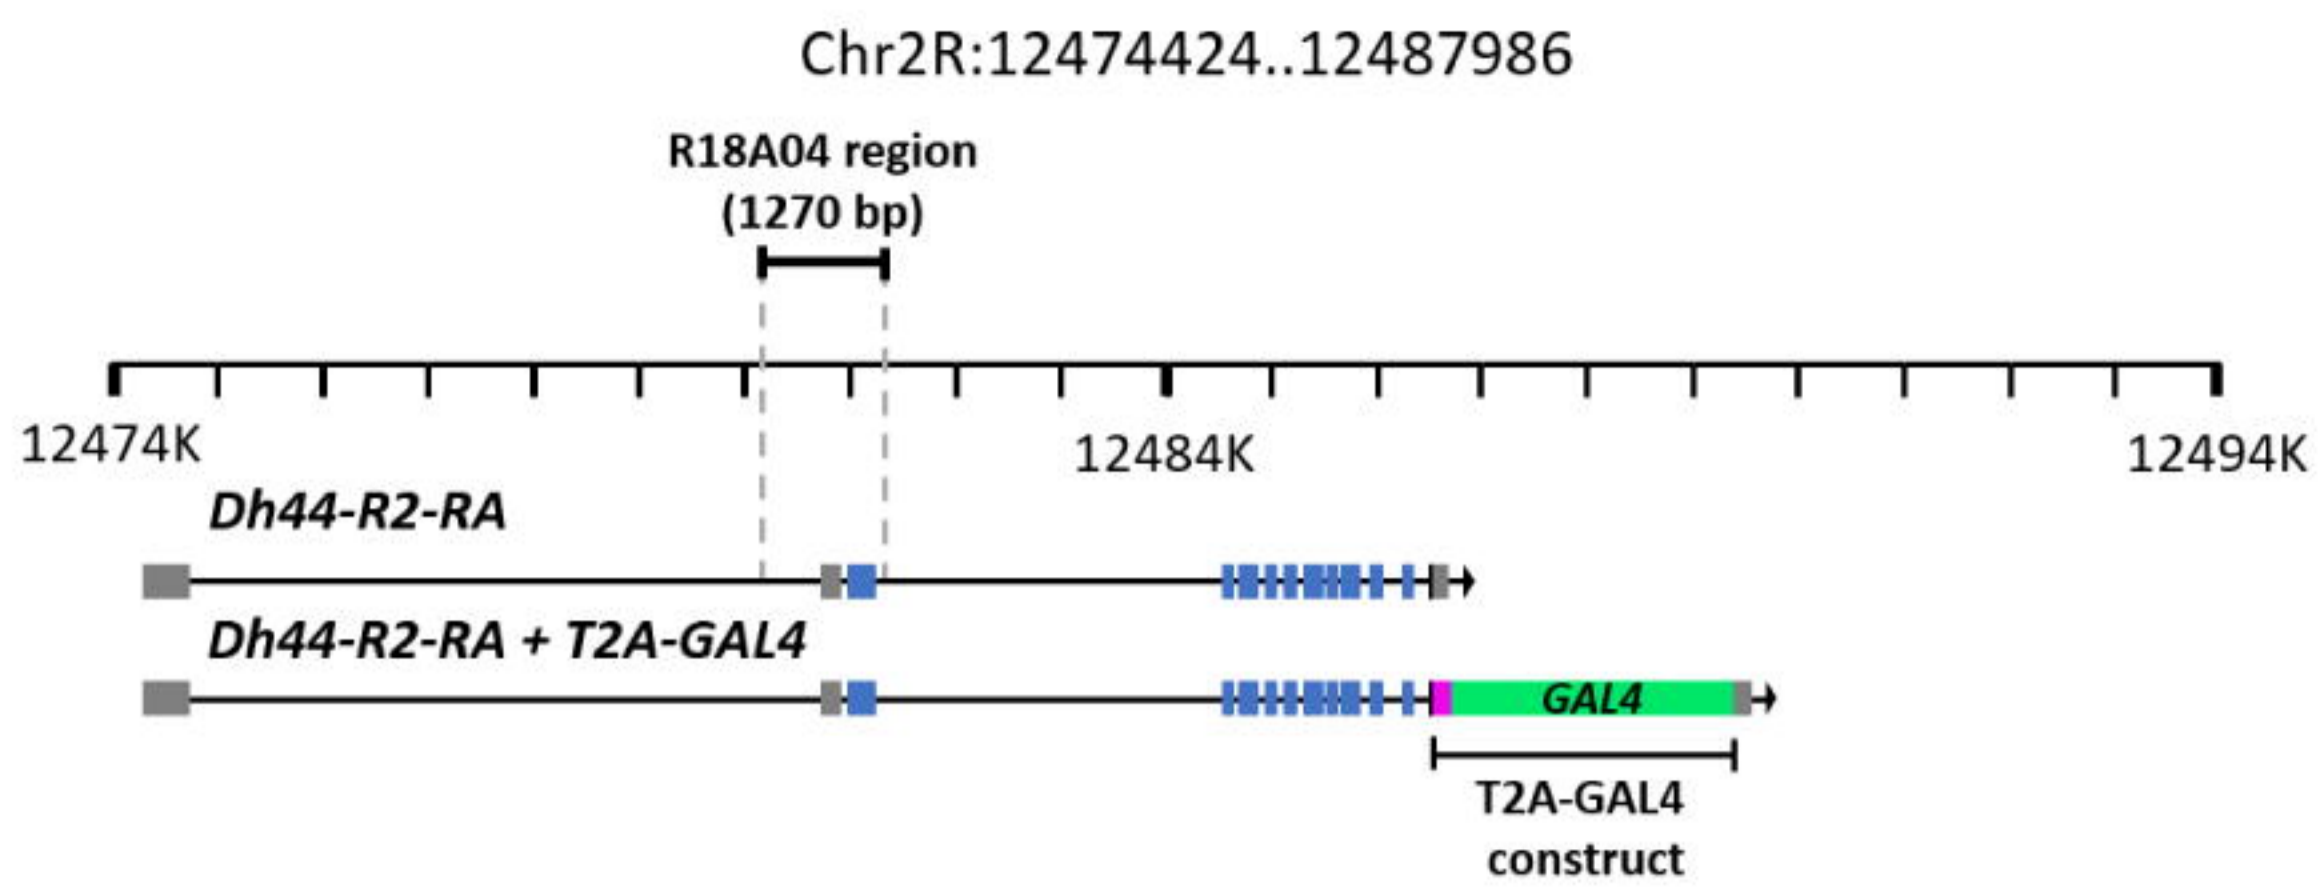

(b)

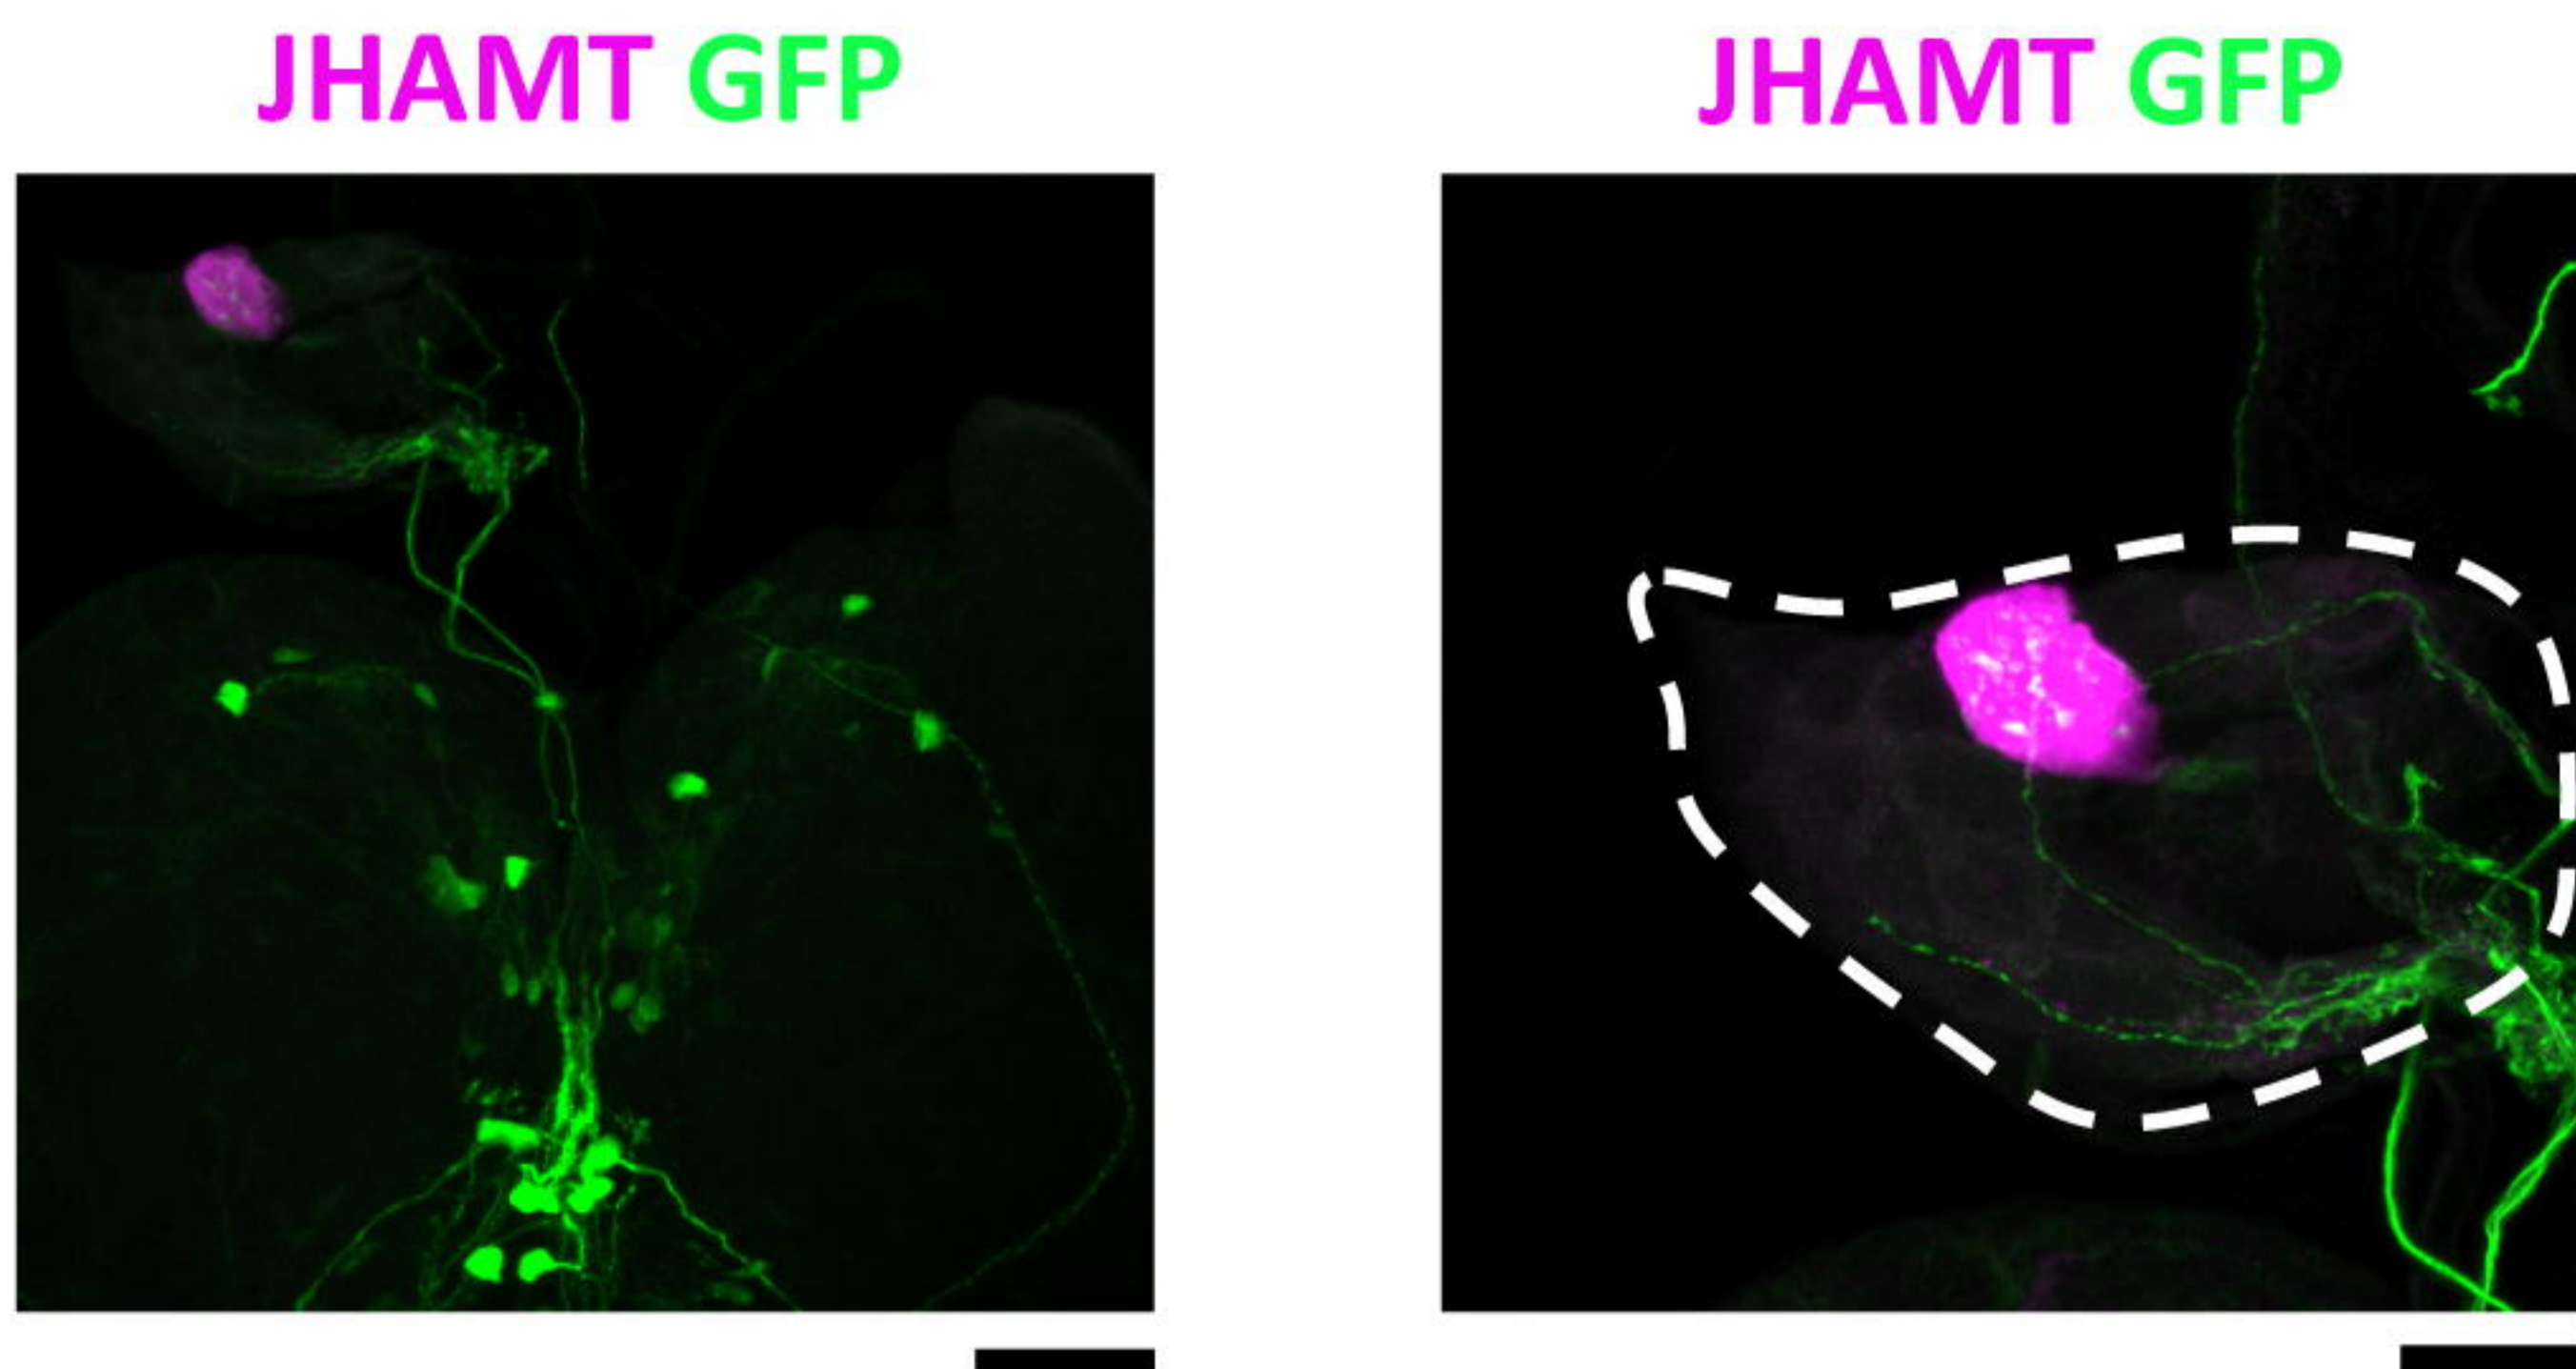

*R18A04 > GFP, mCD8::GFP*

(c)

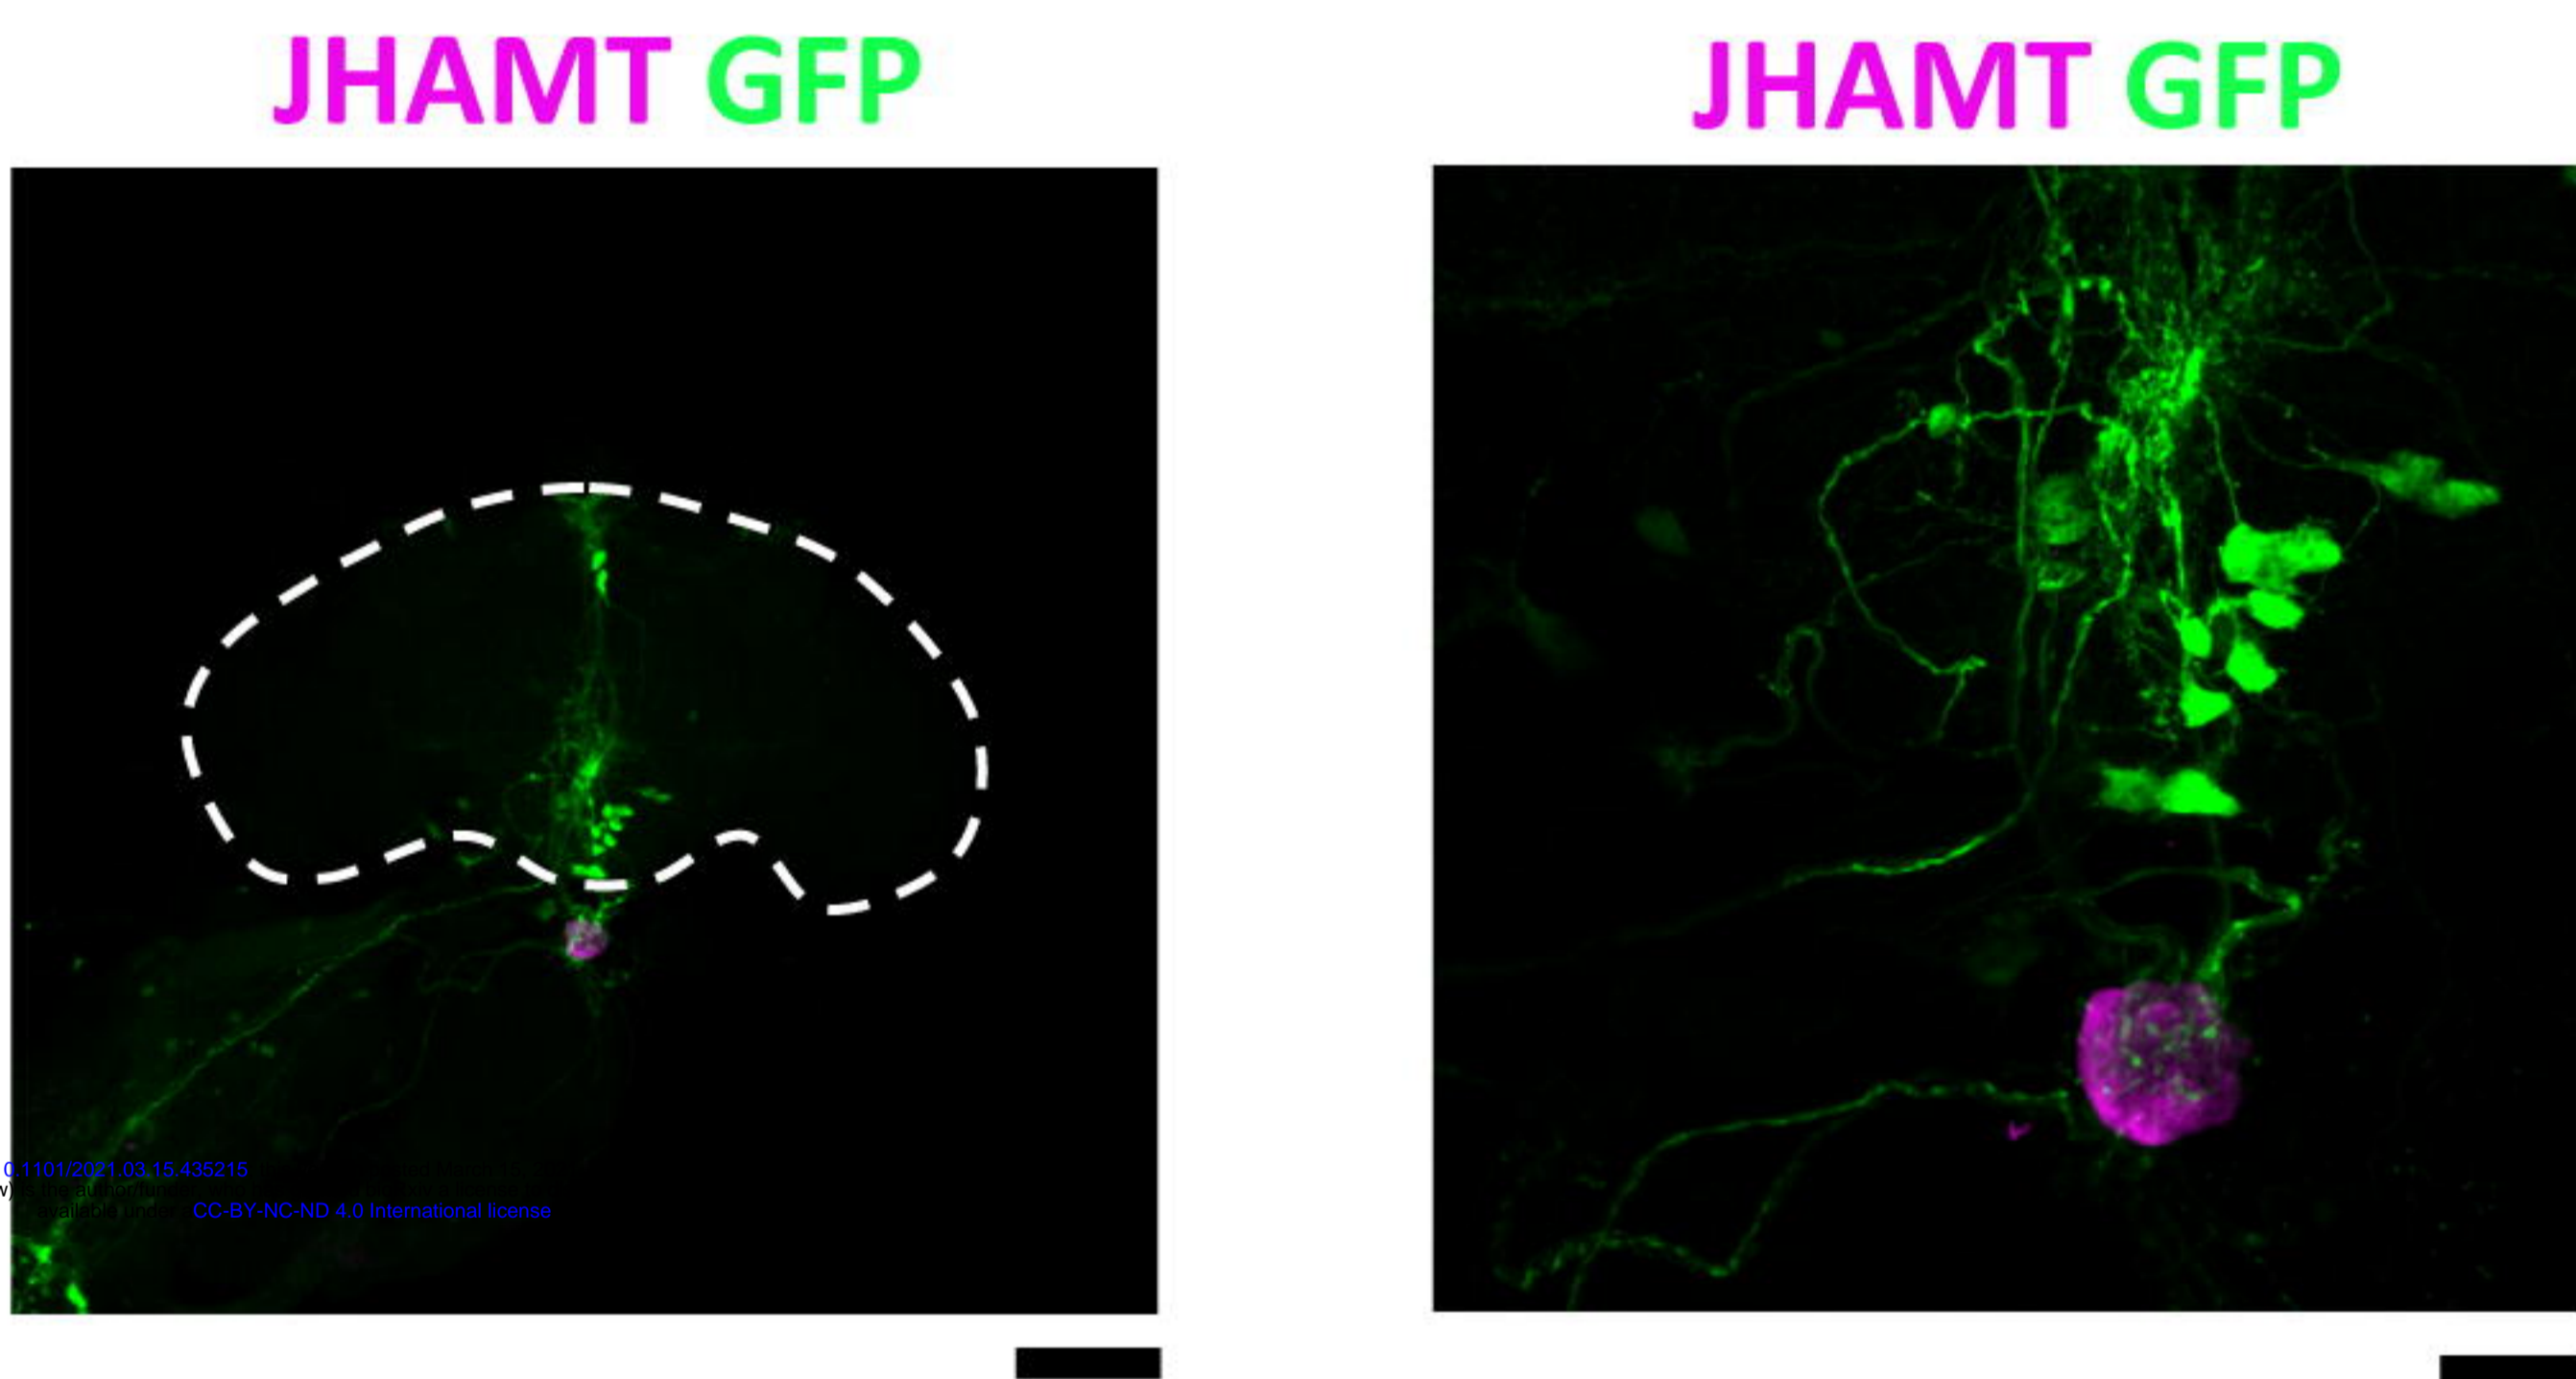

*R18A04 > GFP, mCD8::GFP*

(d)

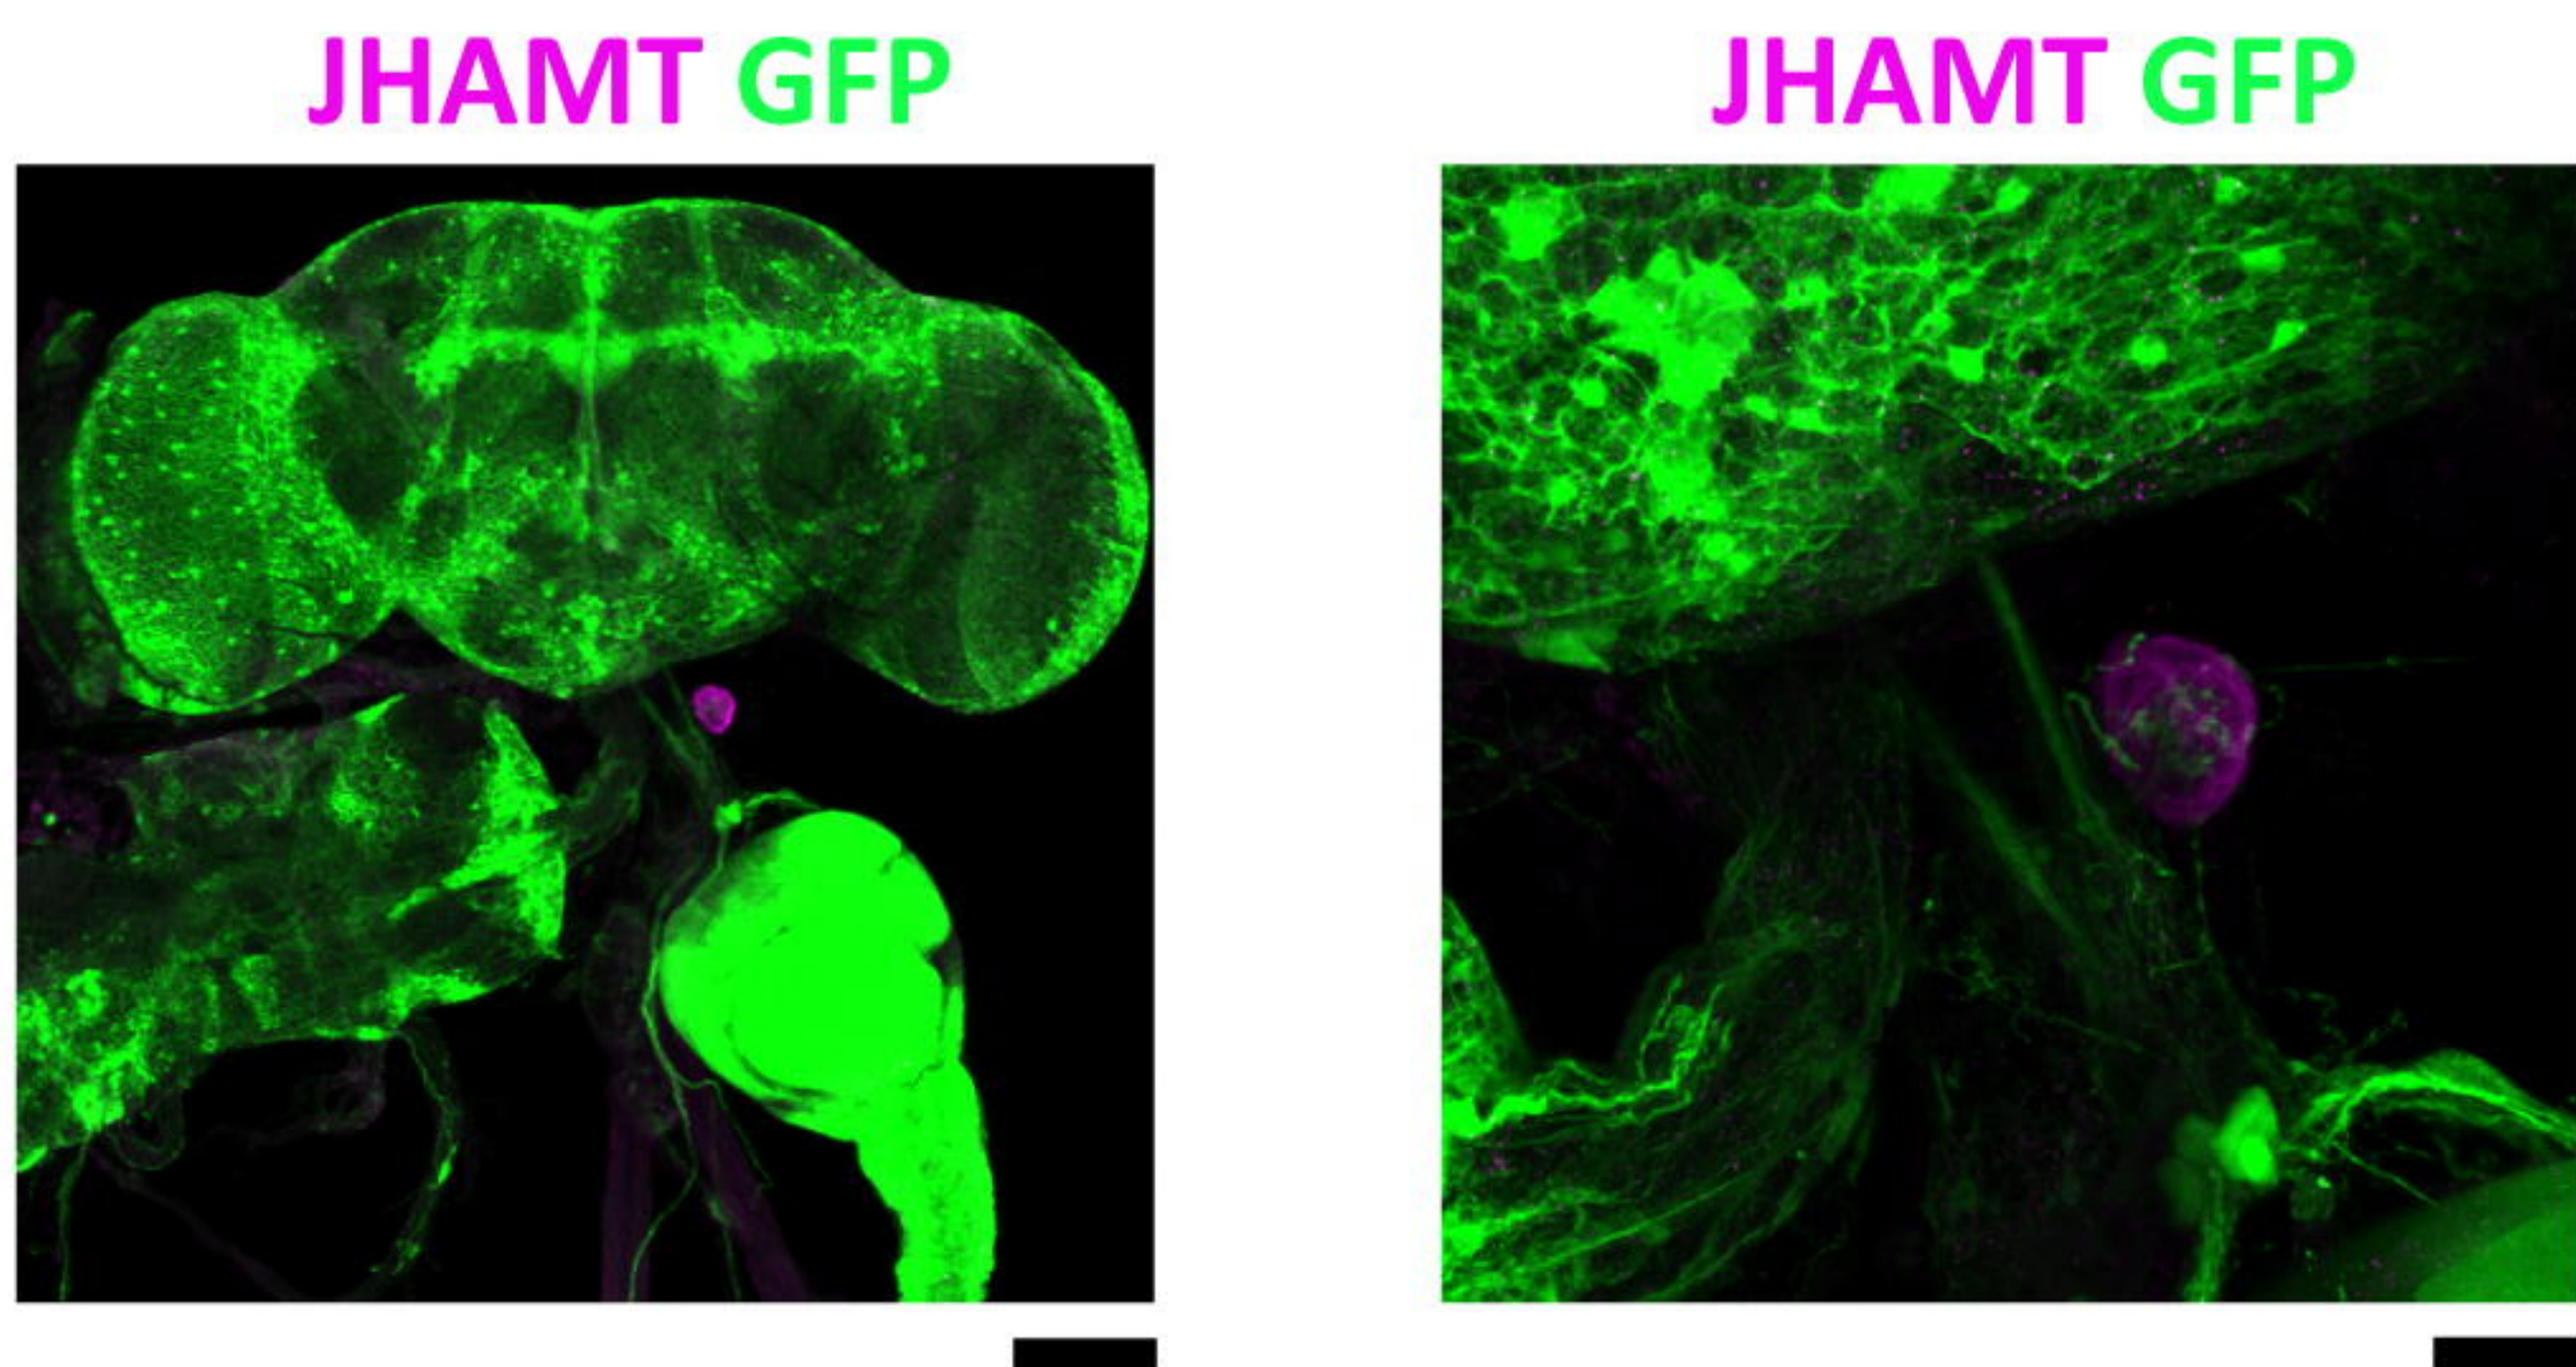

*Dh44-R2-T2A > GFP, mCD8::GFP*



# Fig. 2

(a) **GFP** **mCherry**

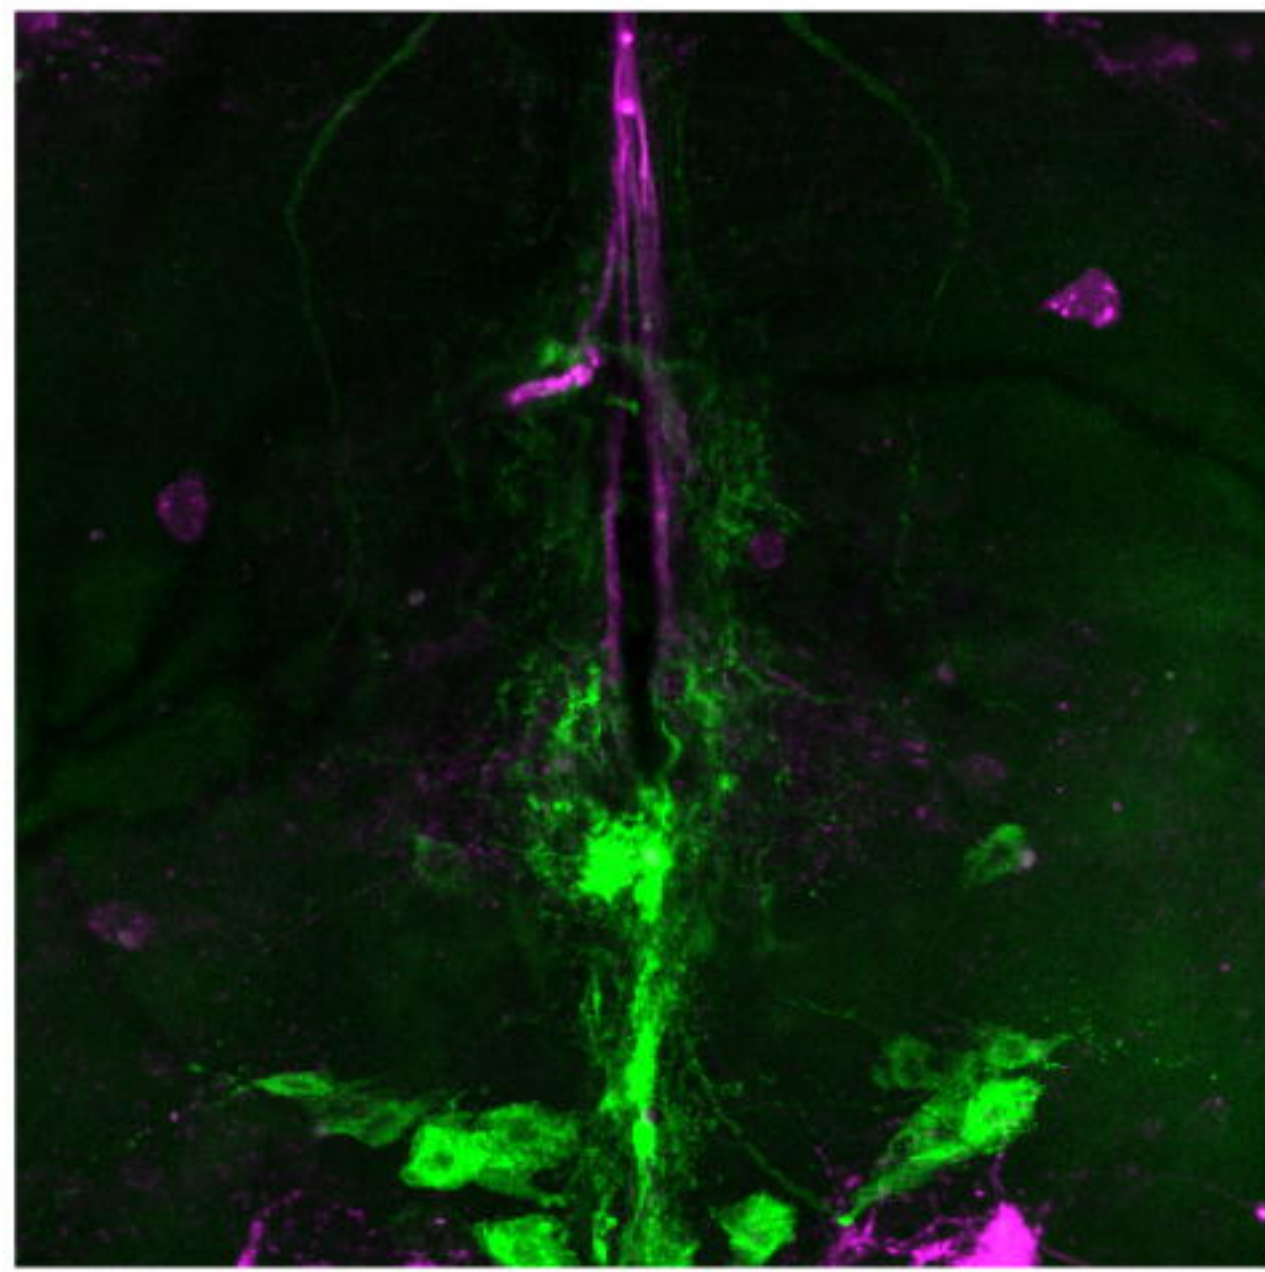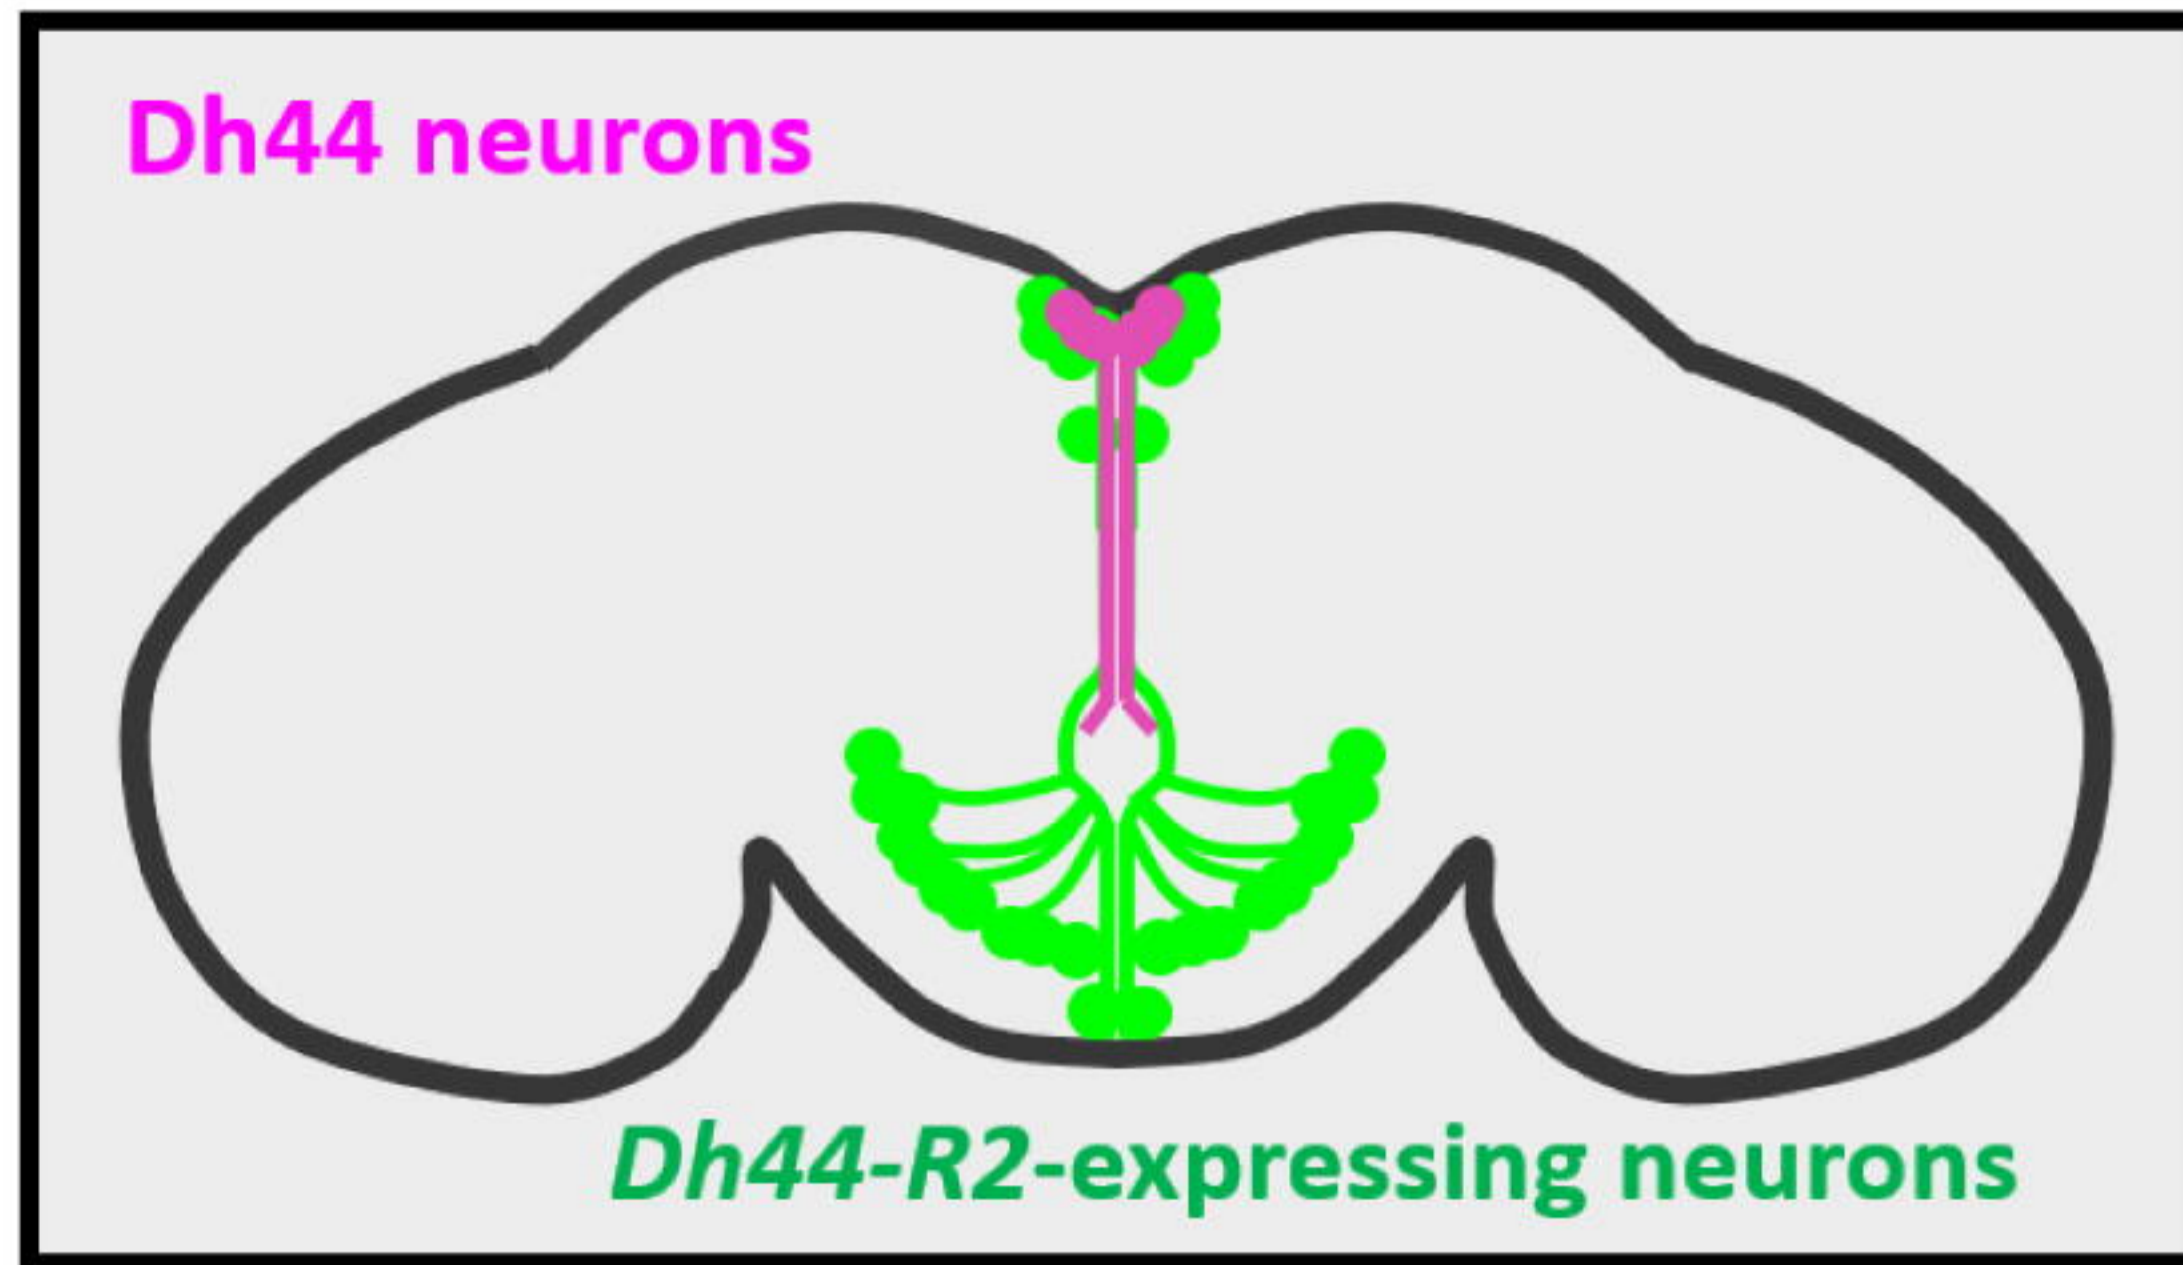

*R18A04-GAL4 > UAS-mCD8::GFP, R65C11-LexA > LexAop-mCherry*

(b)

**GRASP**

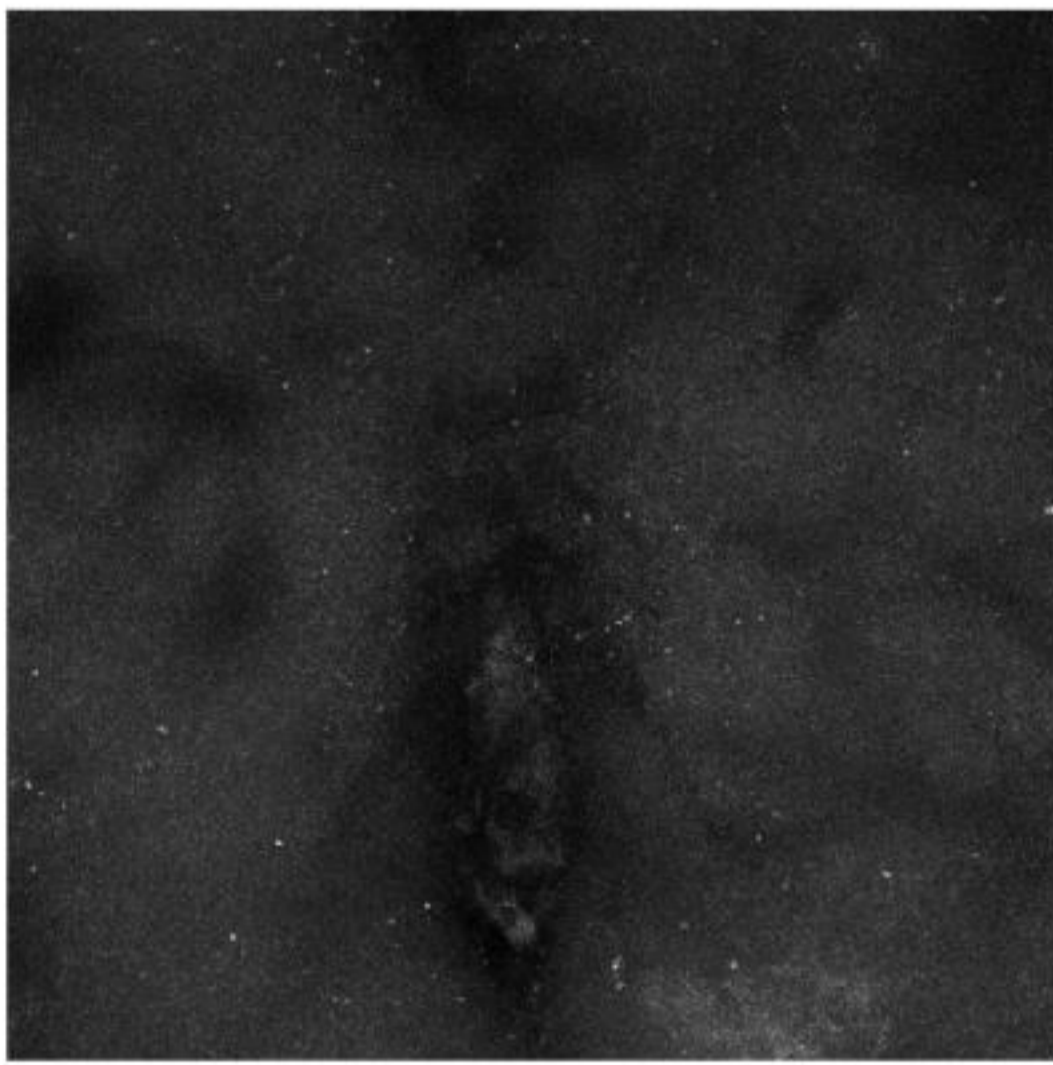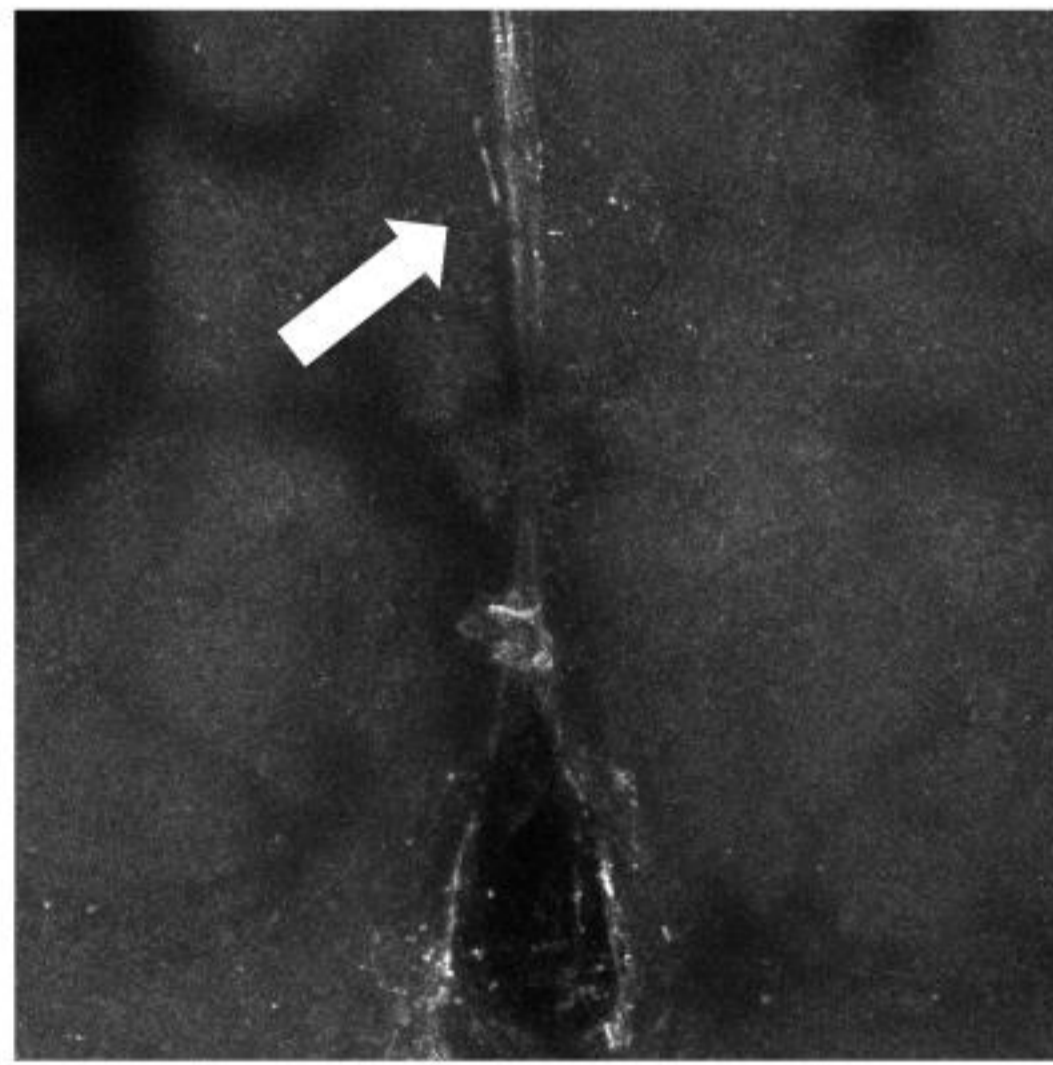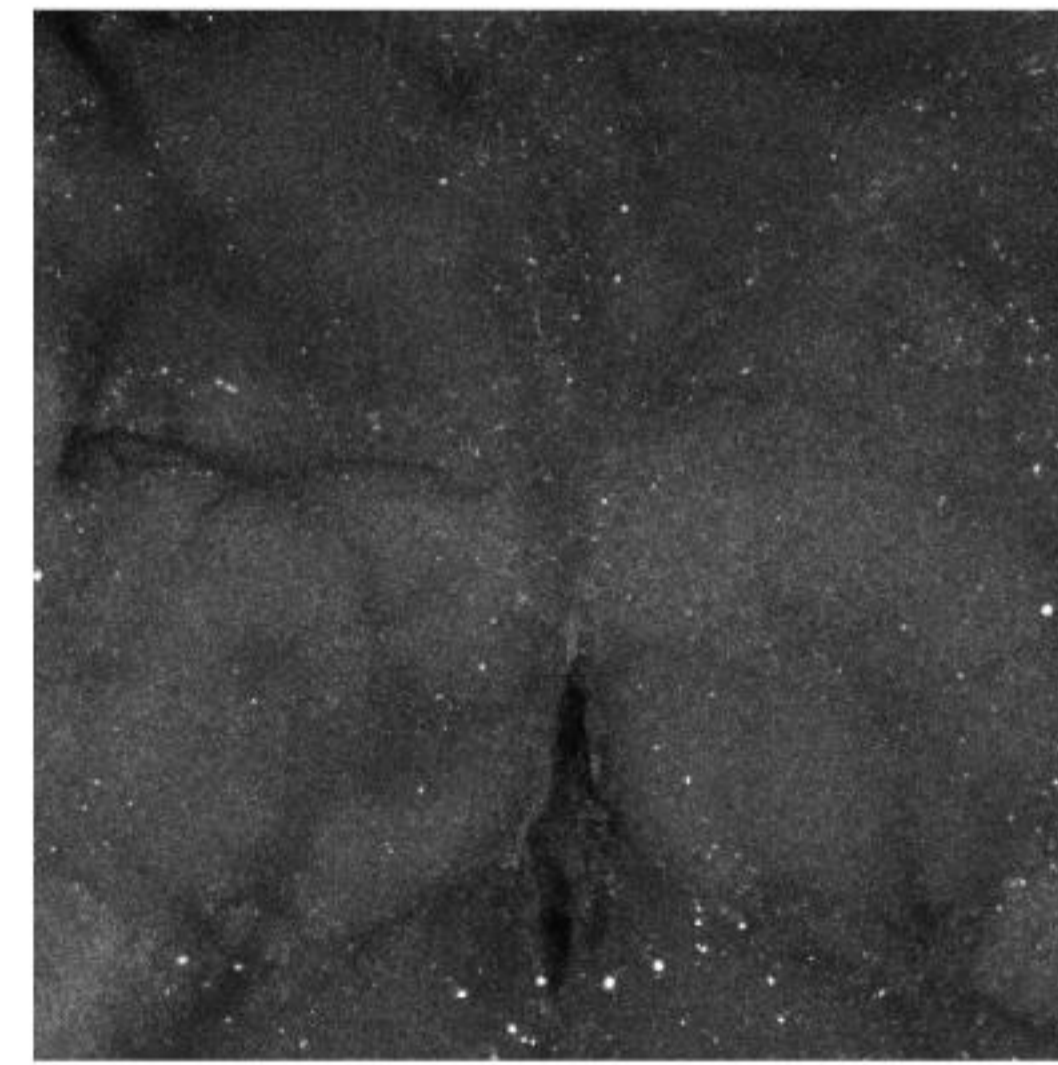

*R18A04-GAL4 >  
UAS- CD4::sp1-10-GFP*

*R18A04-GAL4 >  
UAS- CD4::sp1-10-GFP;  
R65C11-LexA >  
LexAOP-CD4::sp11-GFP*

*R65C11-LexA >  
LexAOP-CD4::sp11-GFP*



# Fig. 3

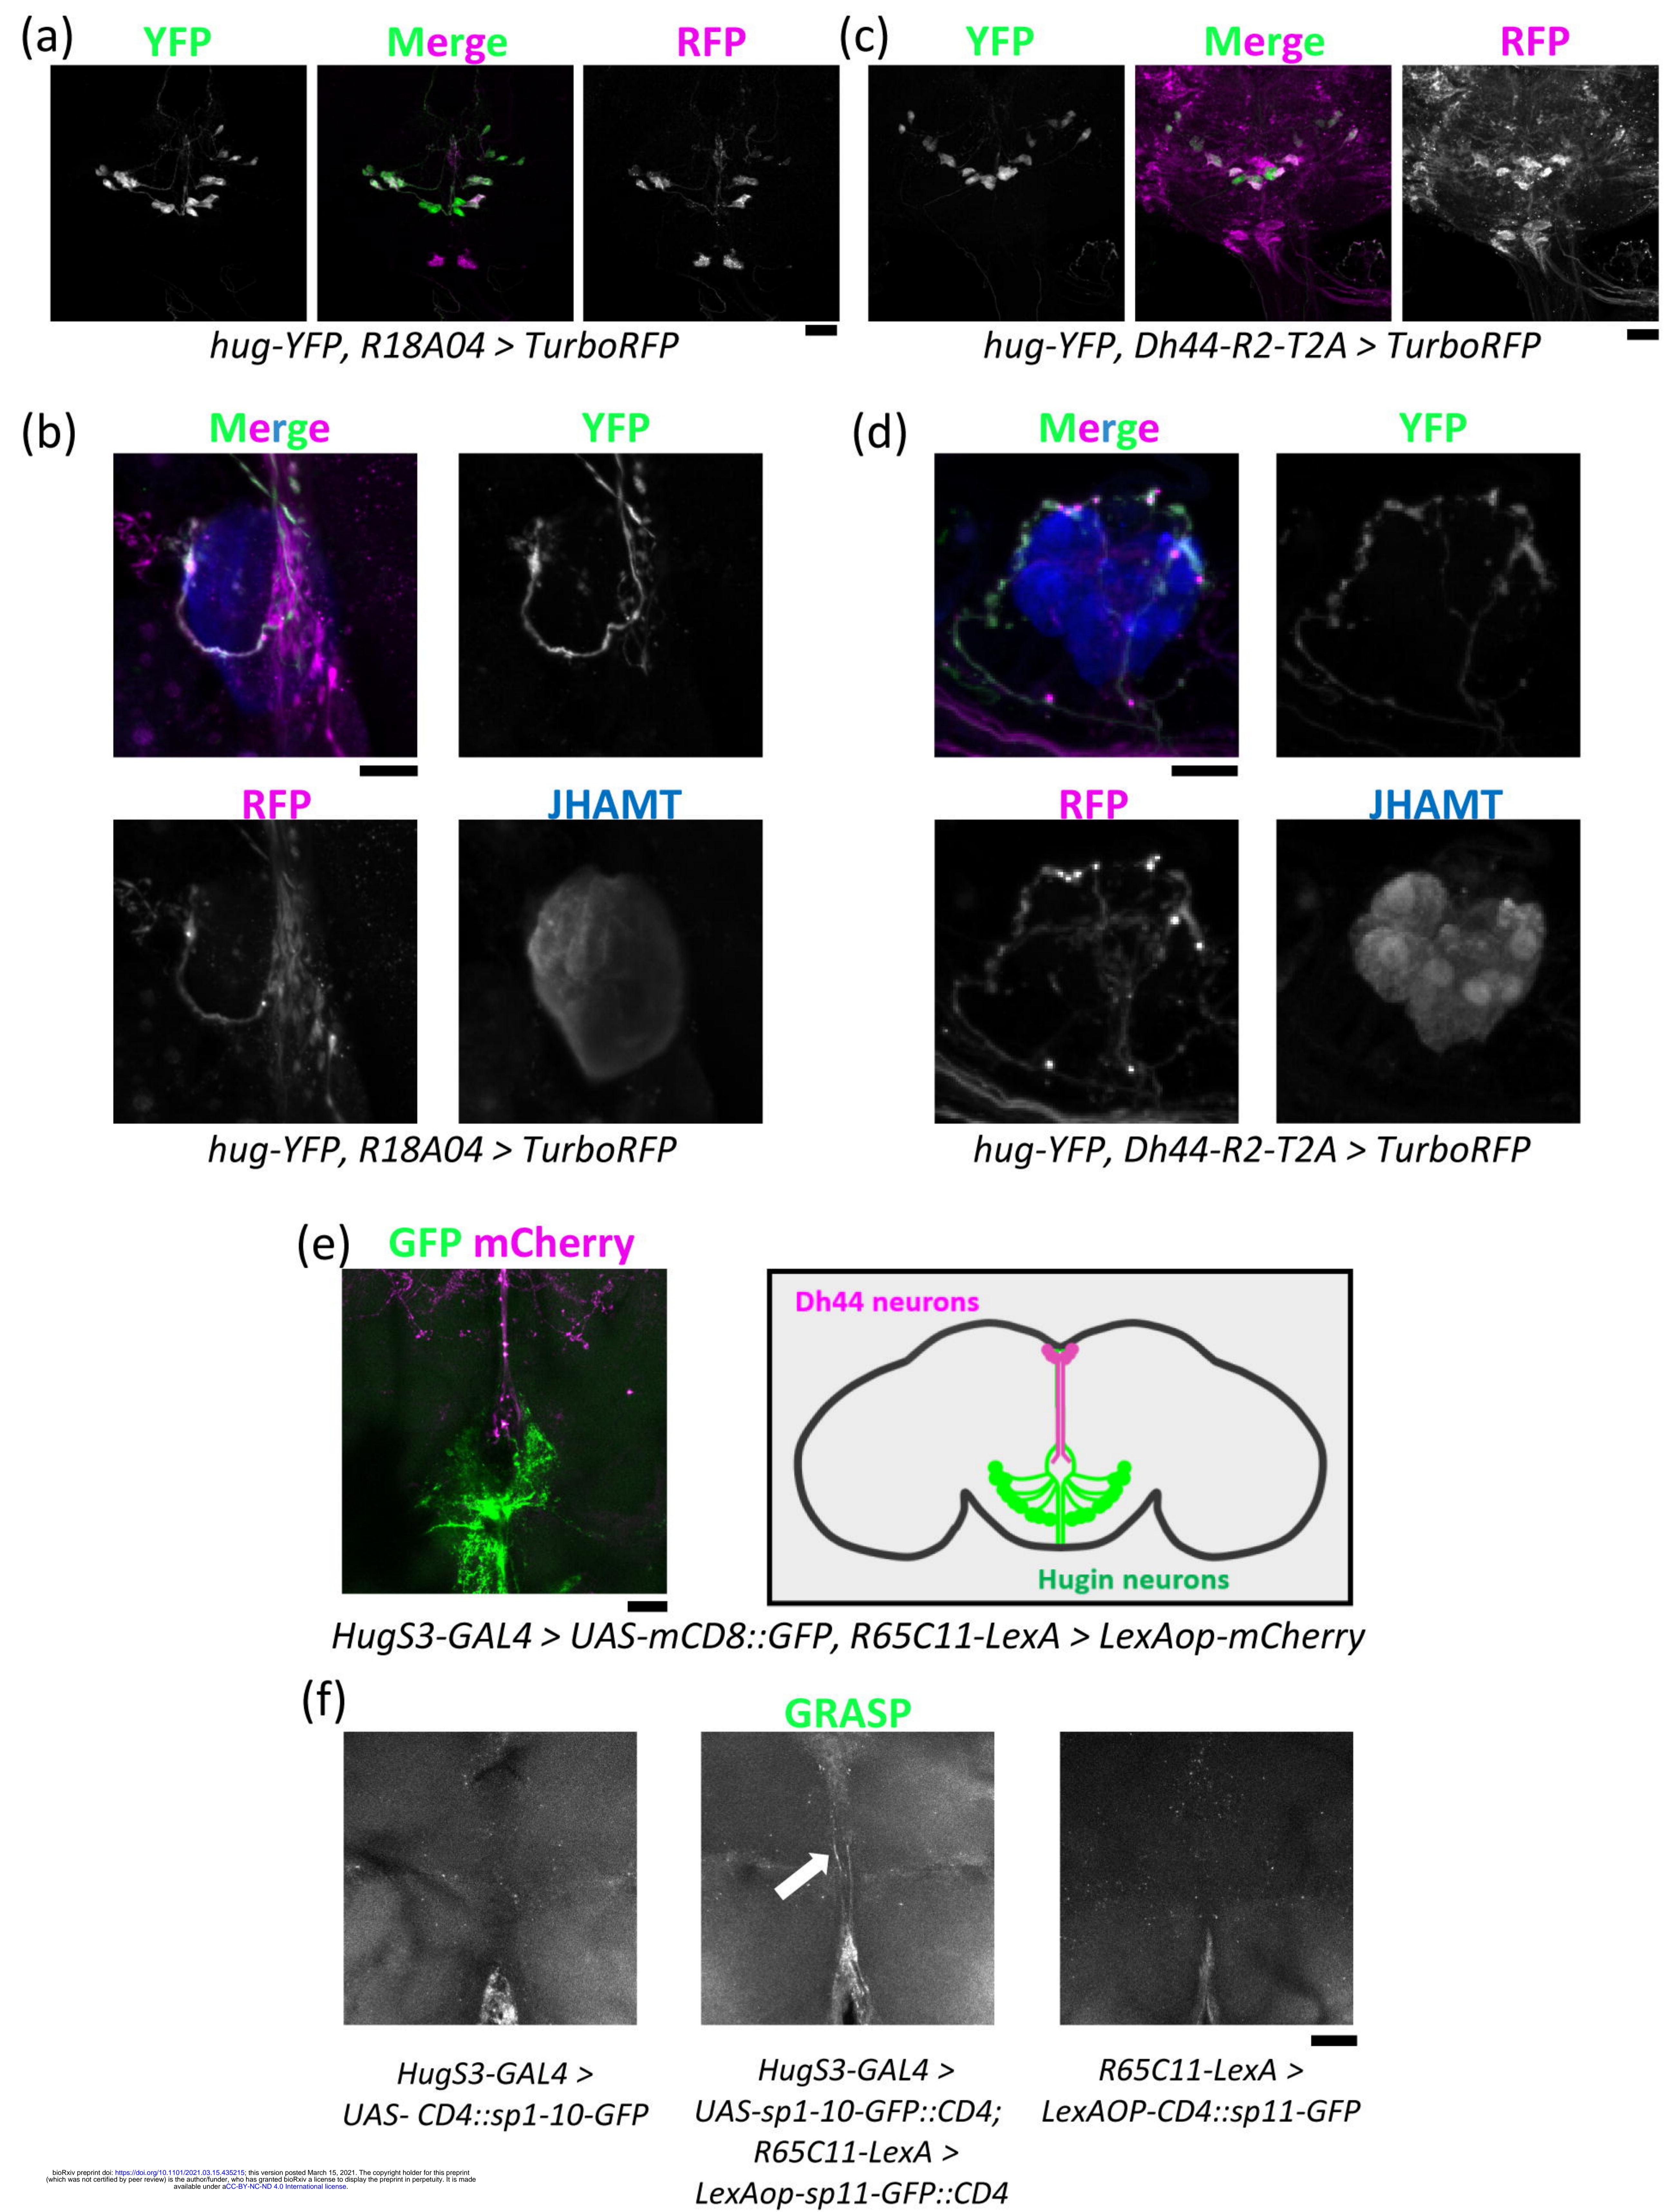



# Fig. 4

(a)

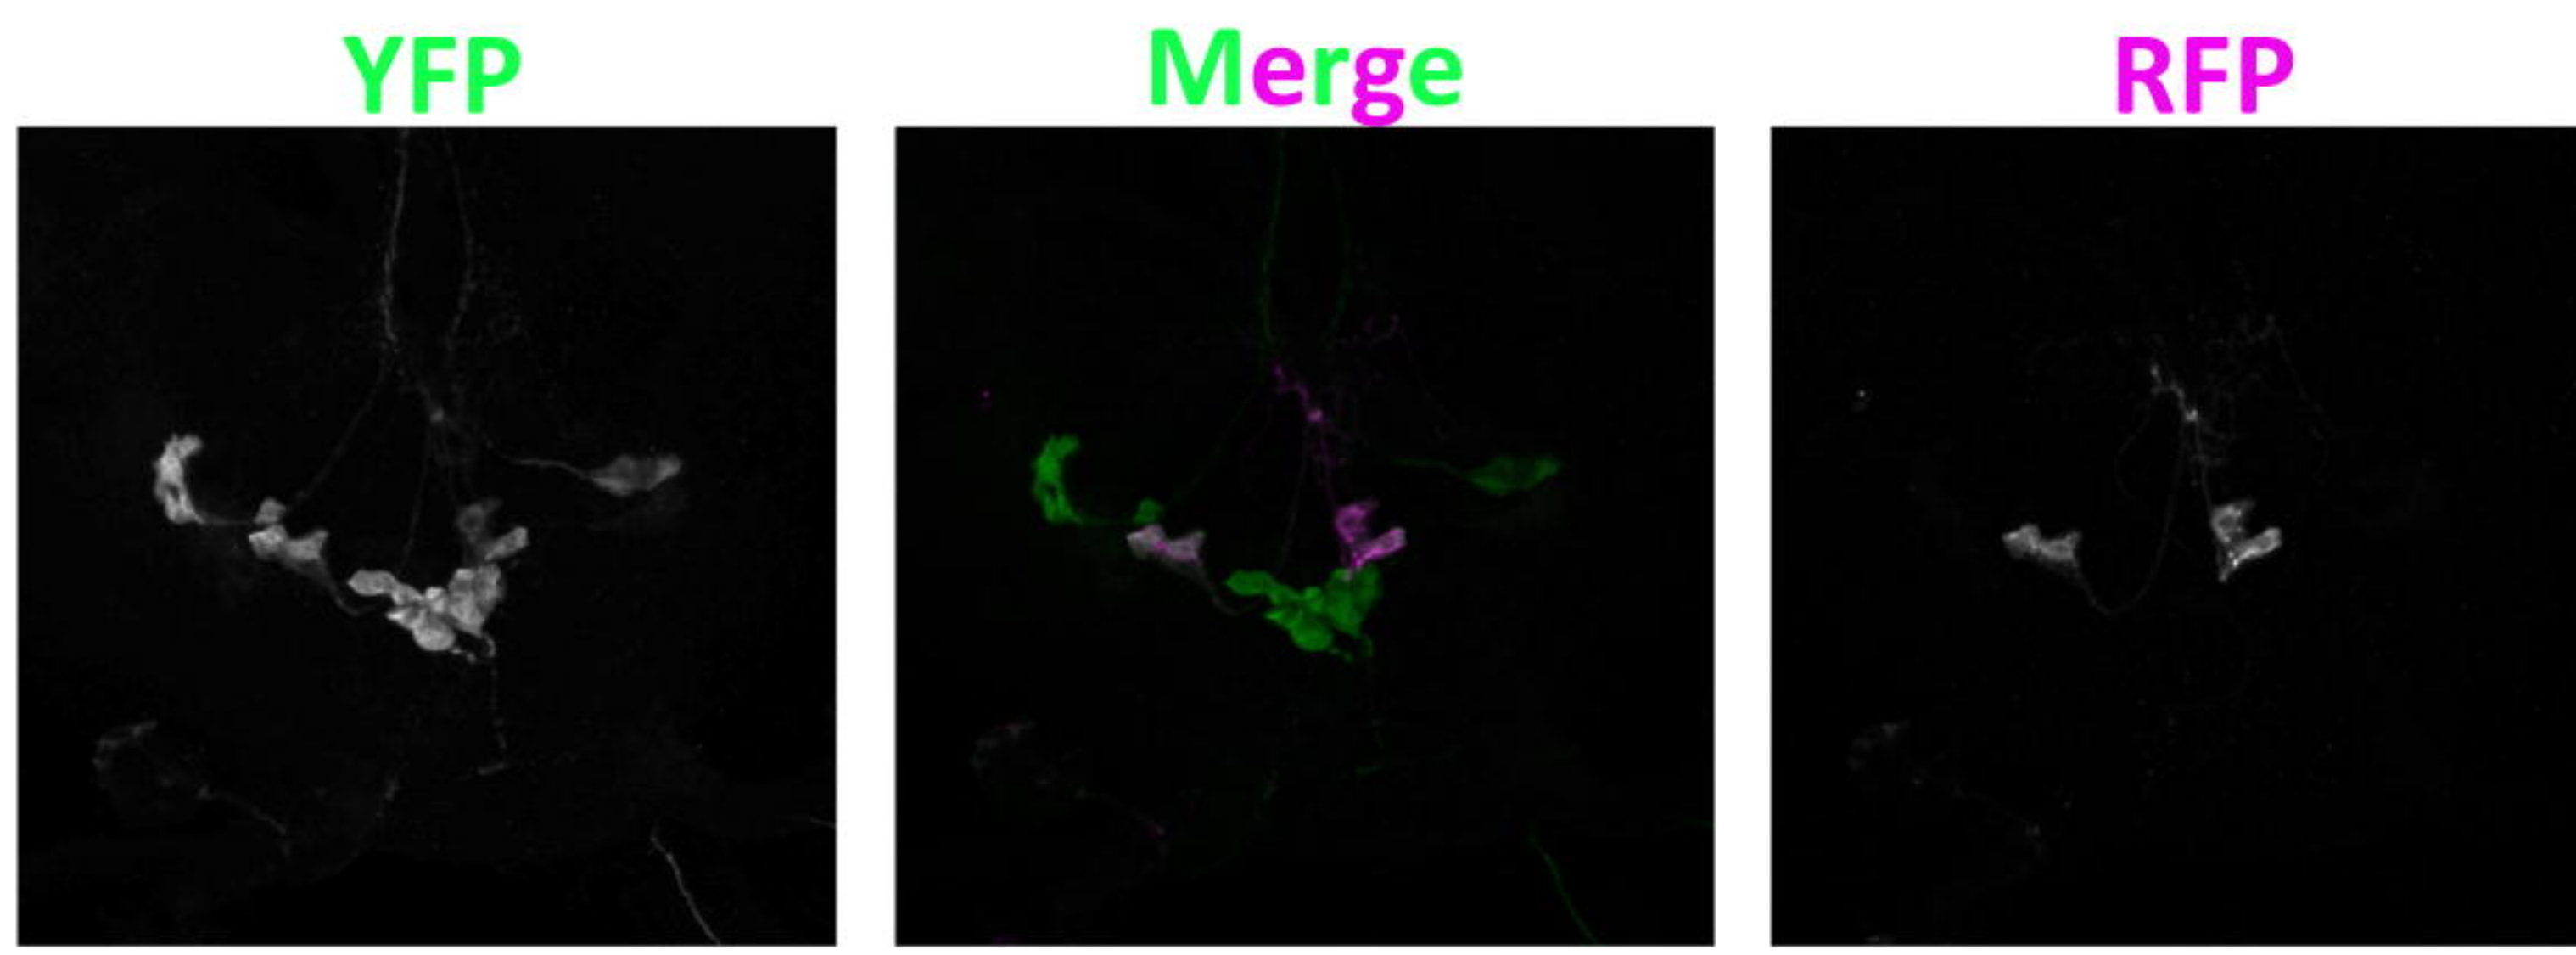

(b)

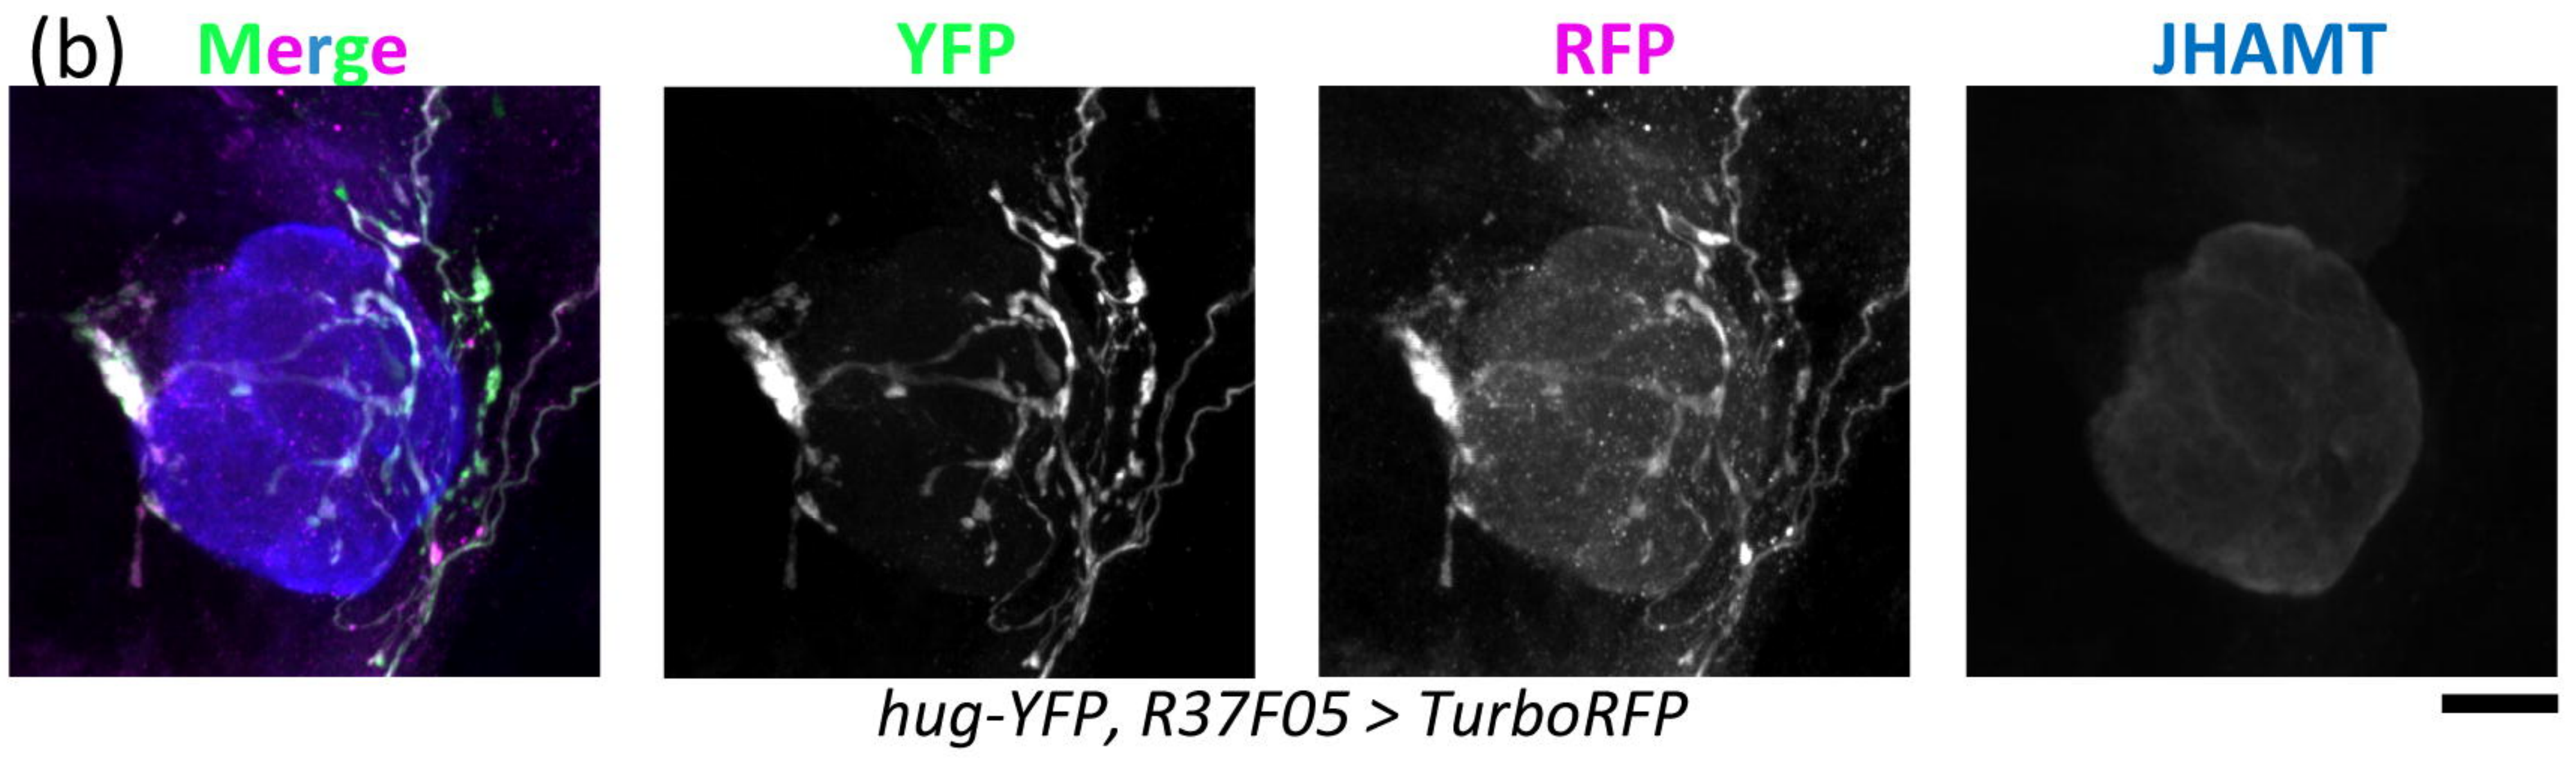

(c)

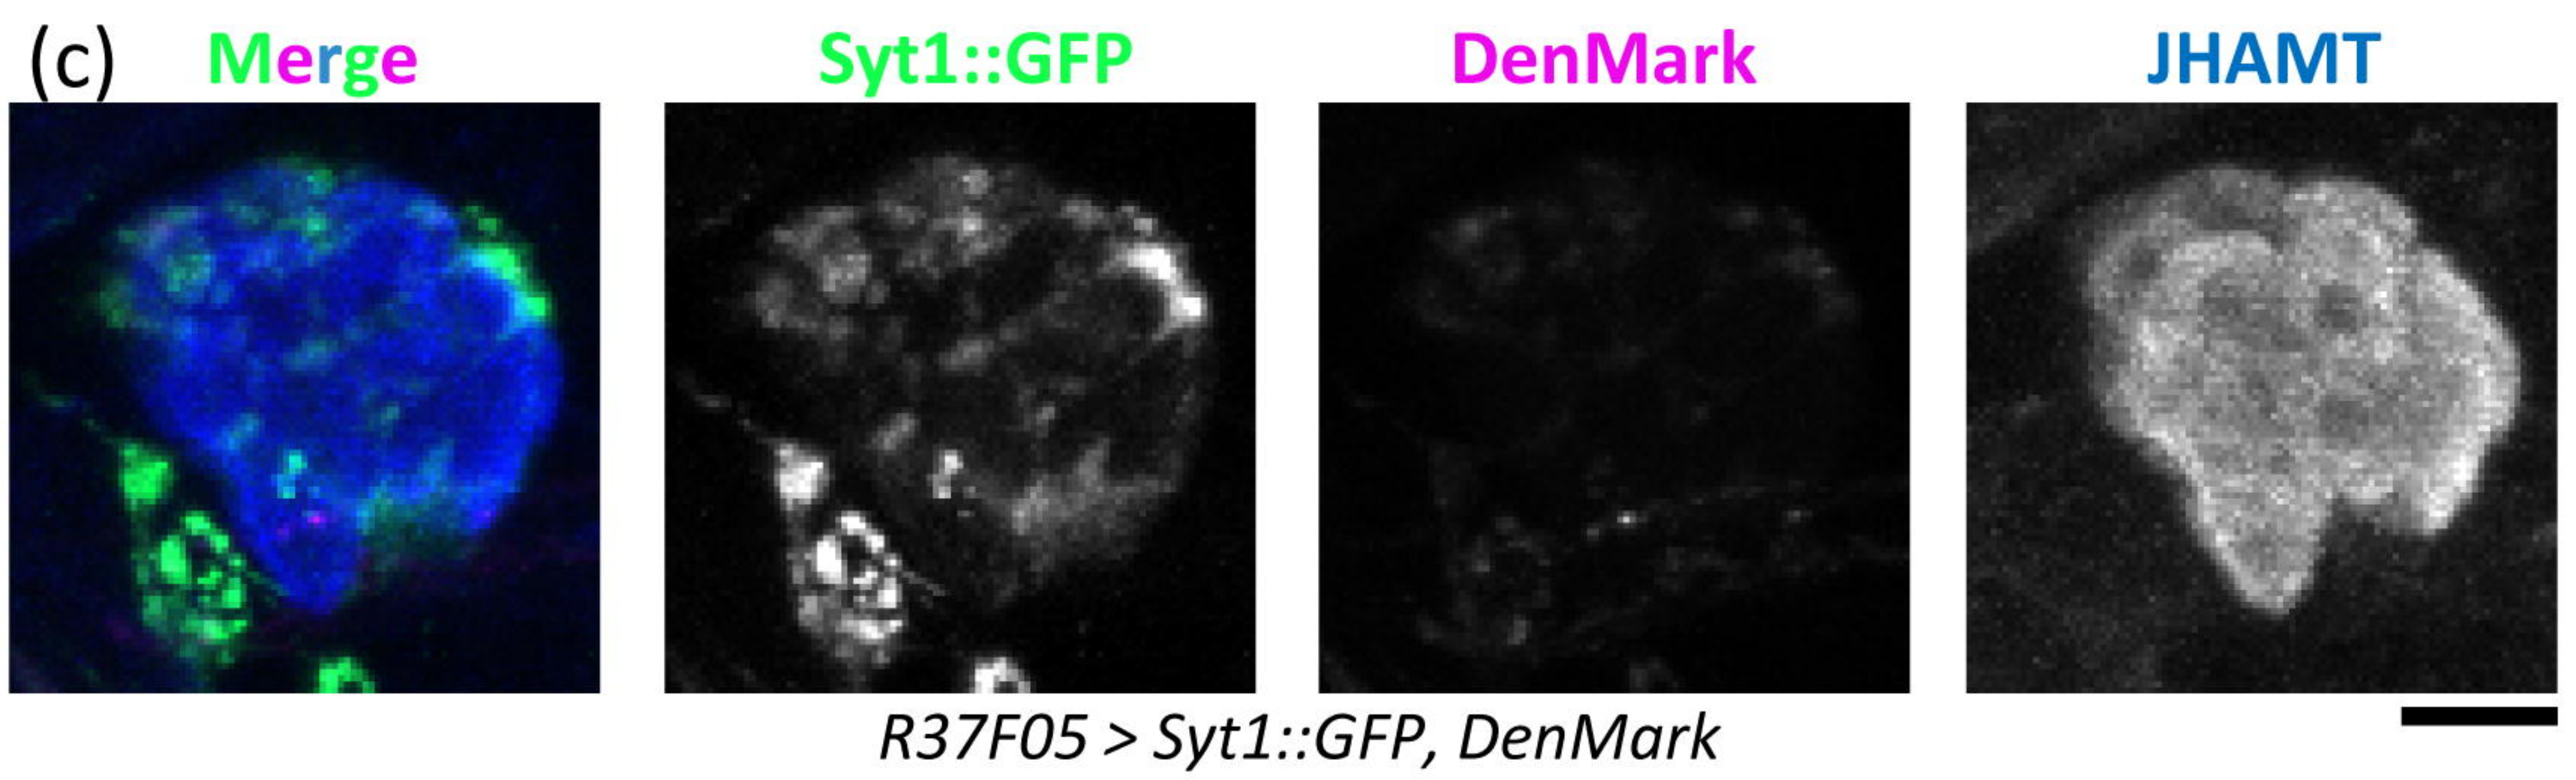

(d)

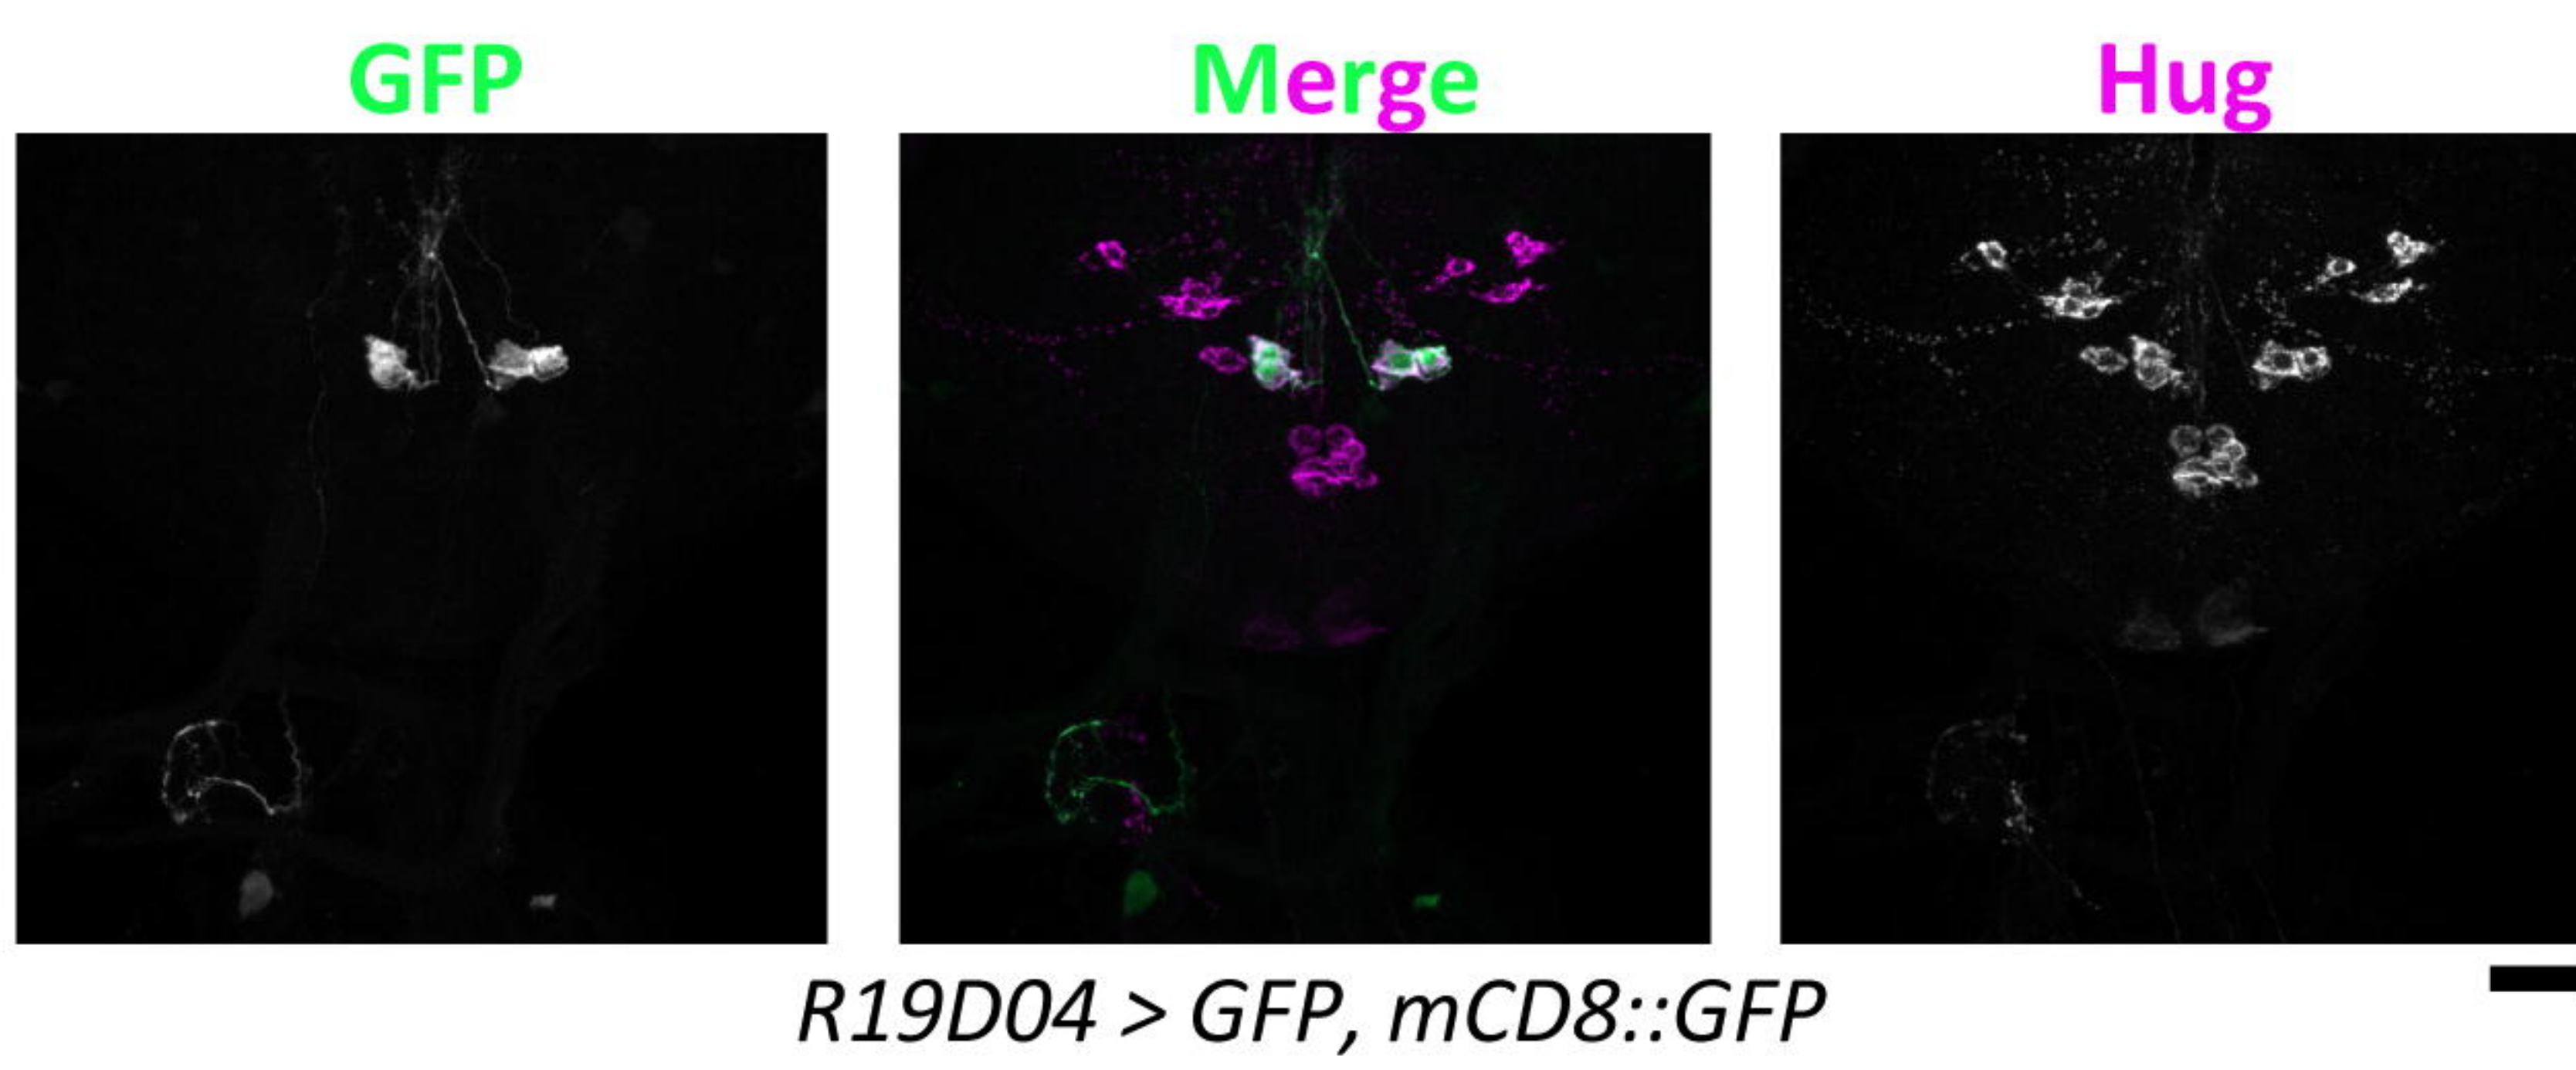

(e)

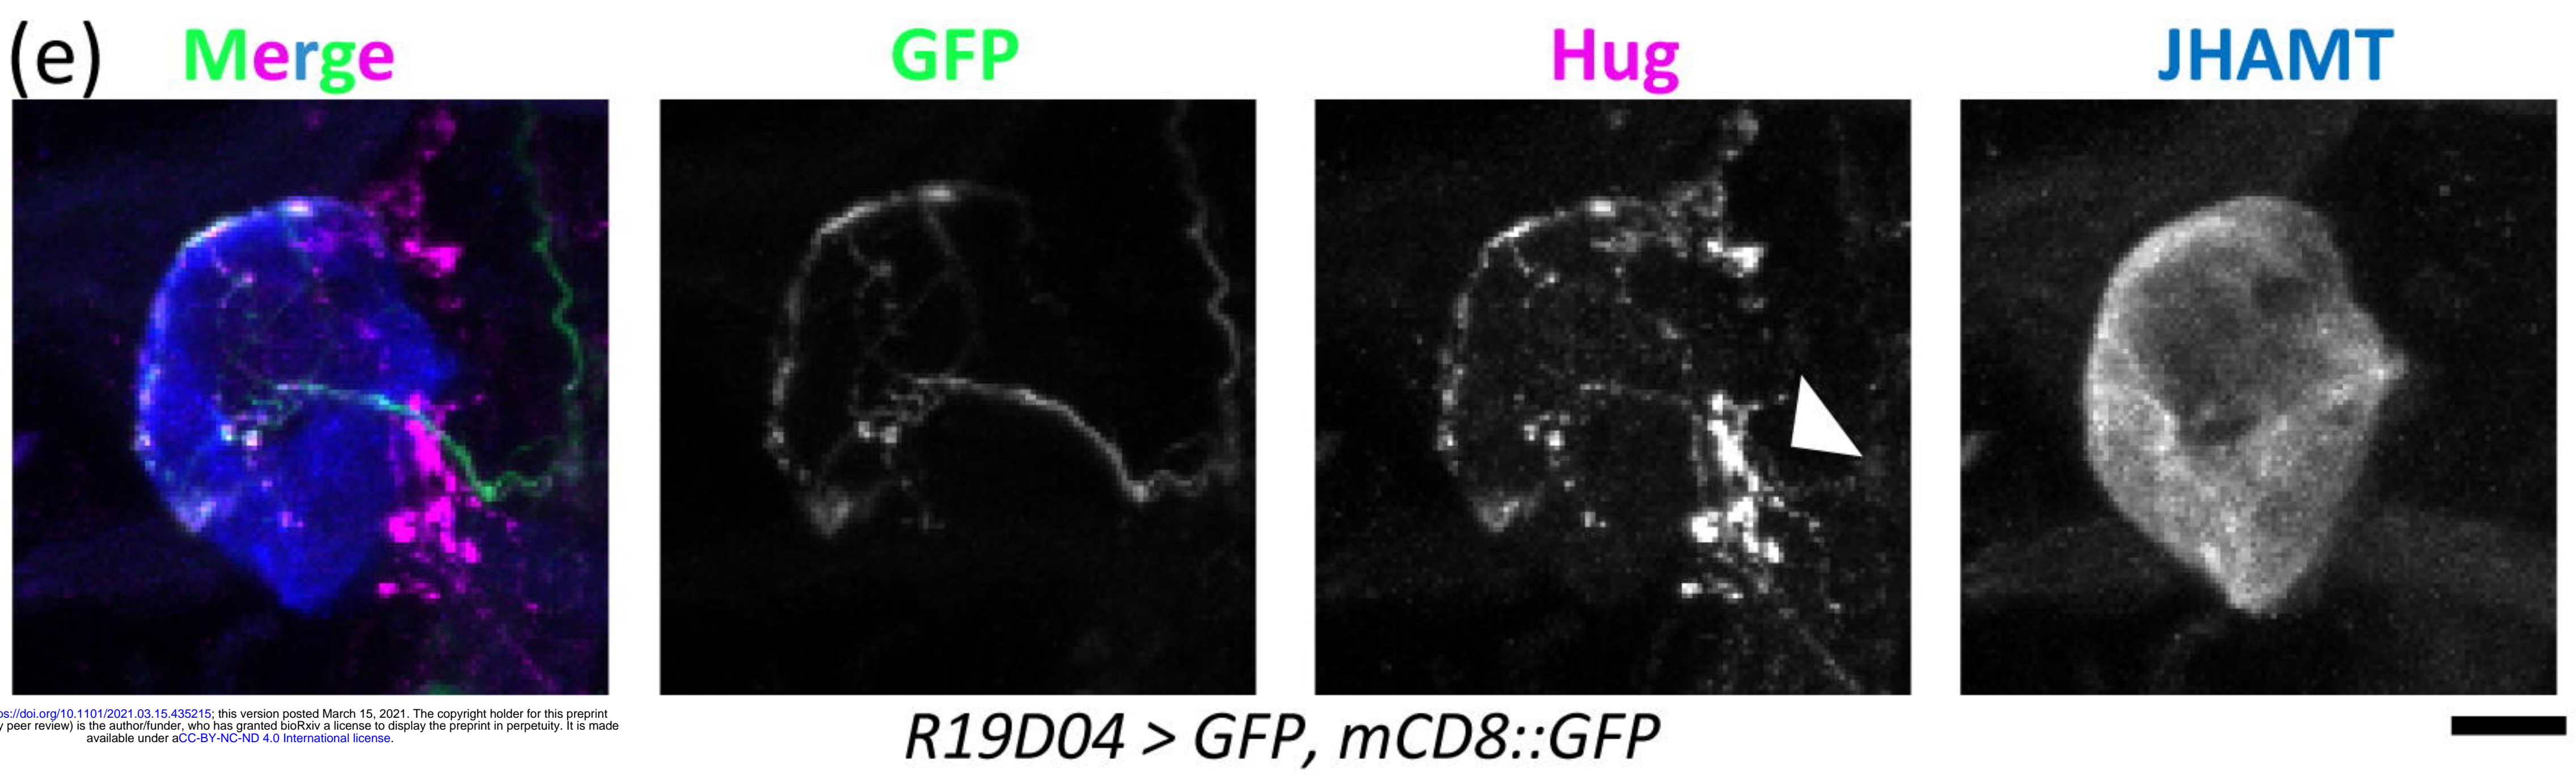



# Fig. 5

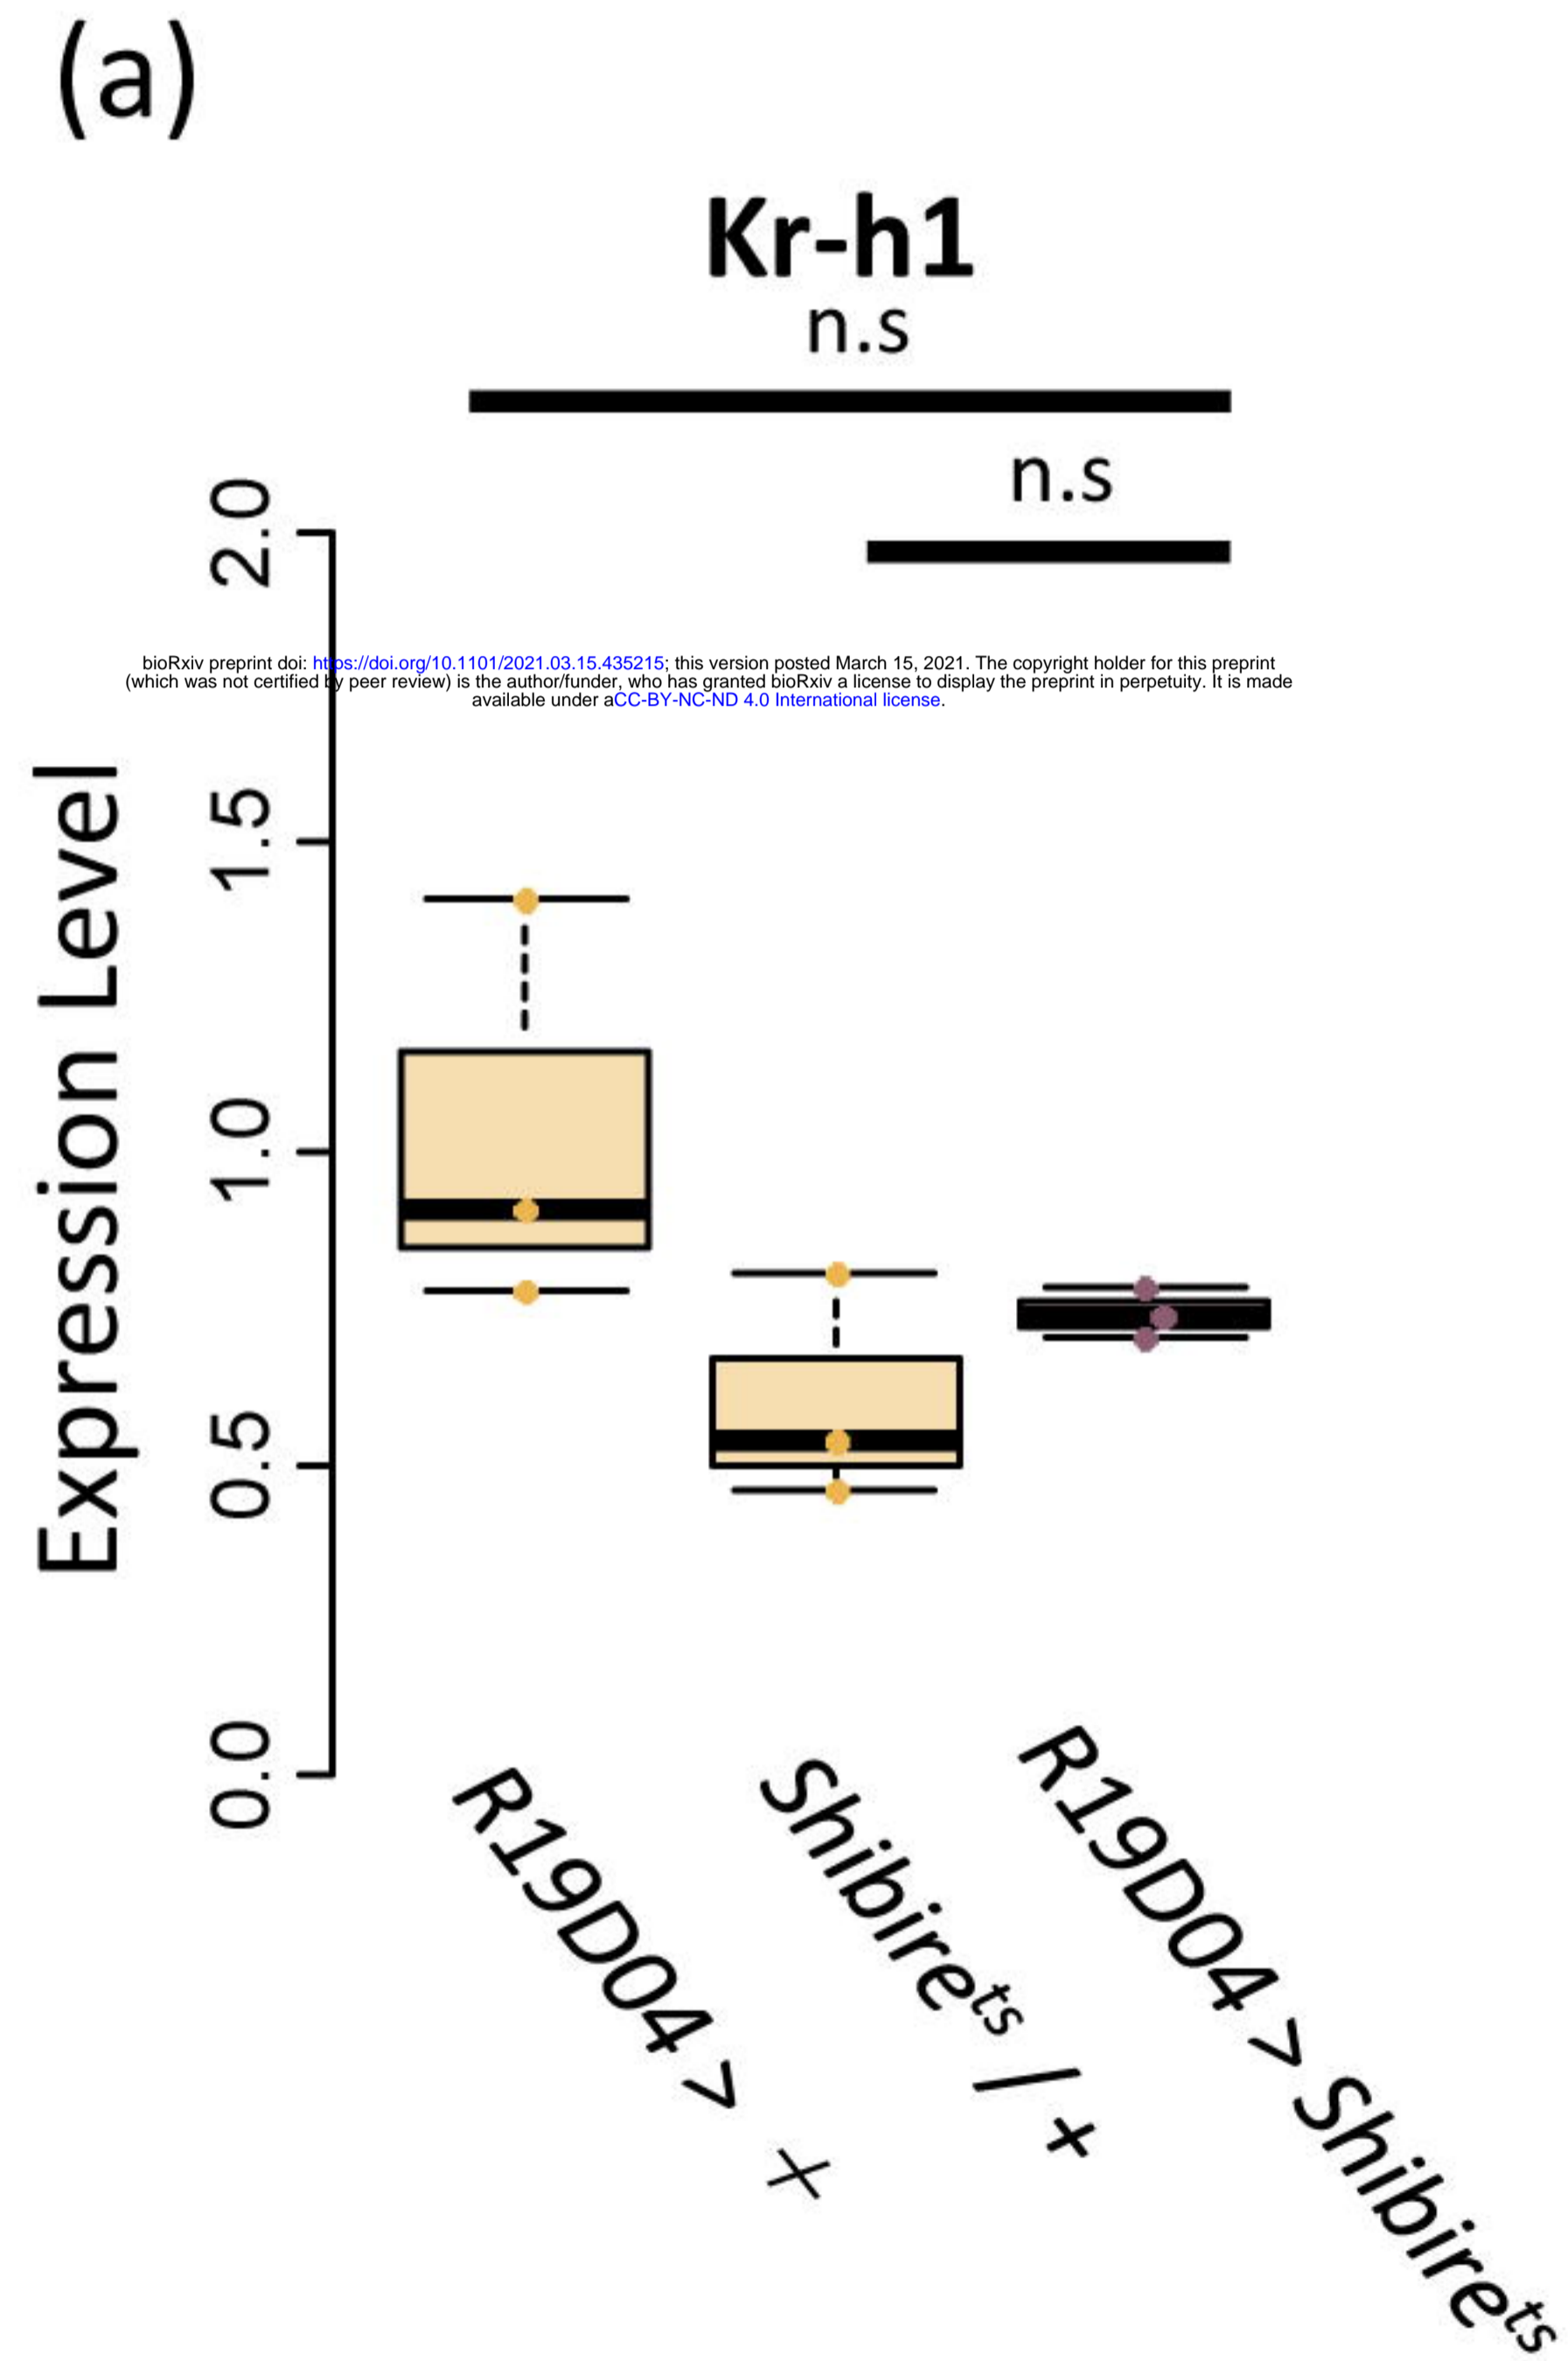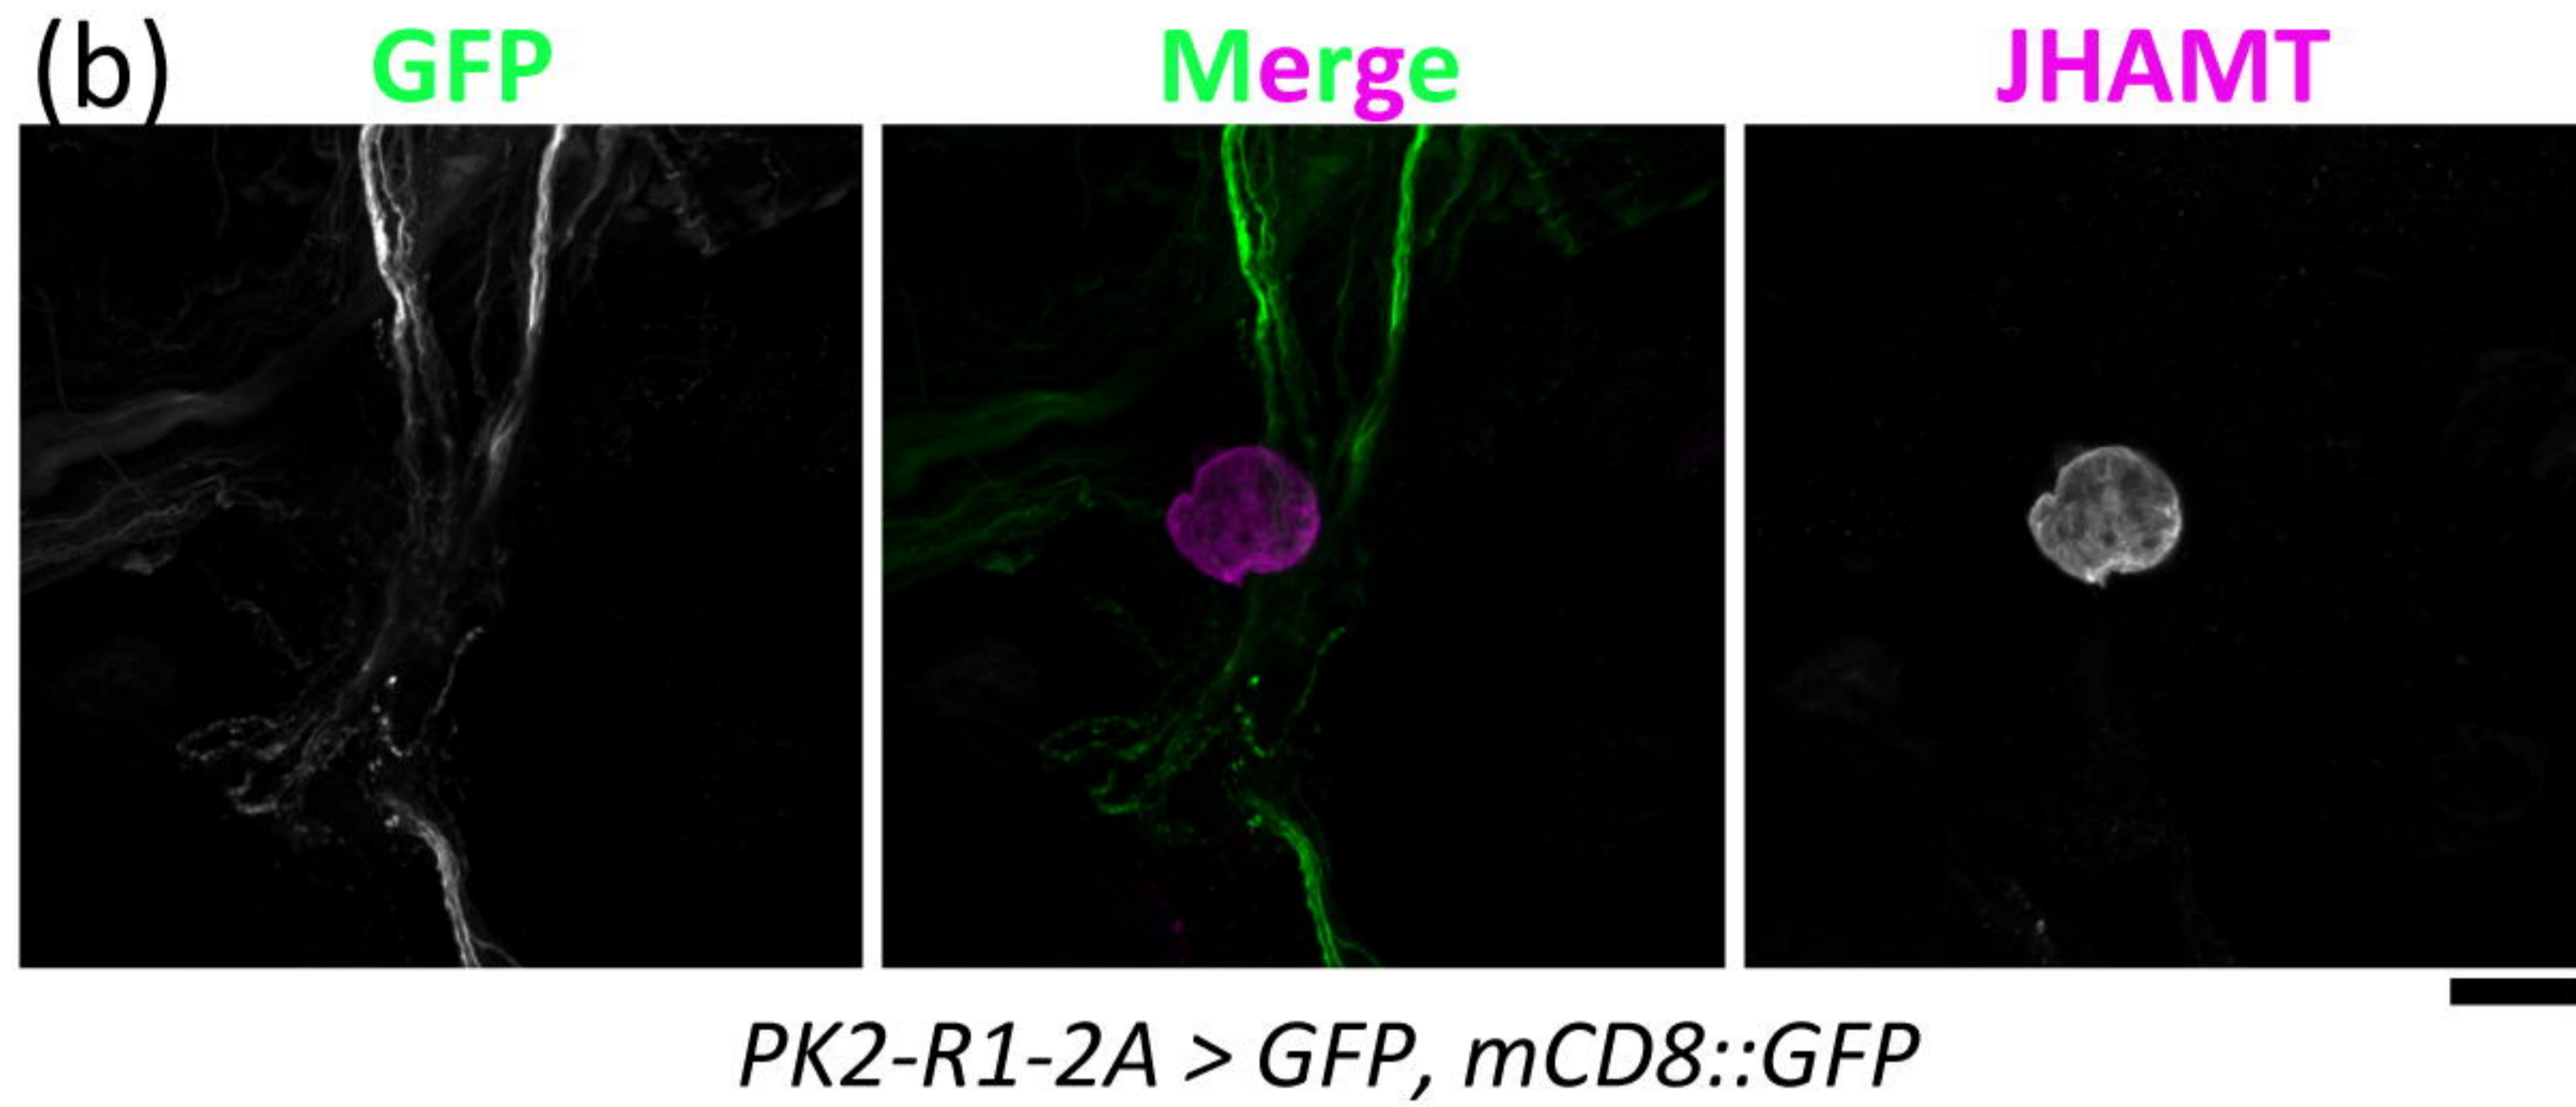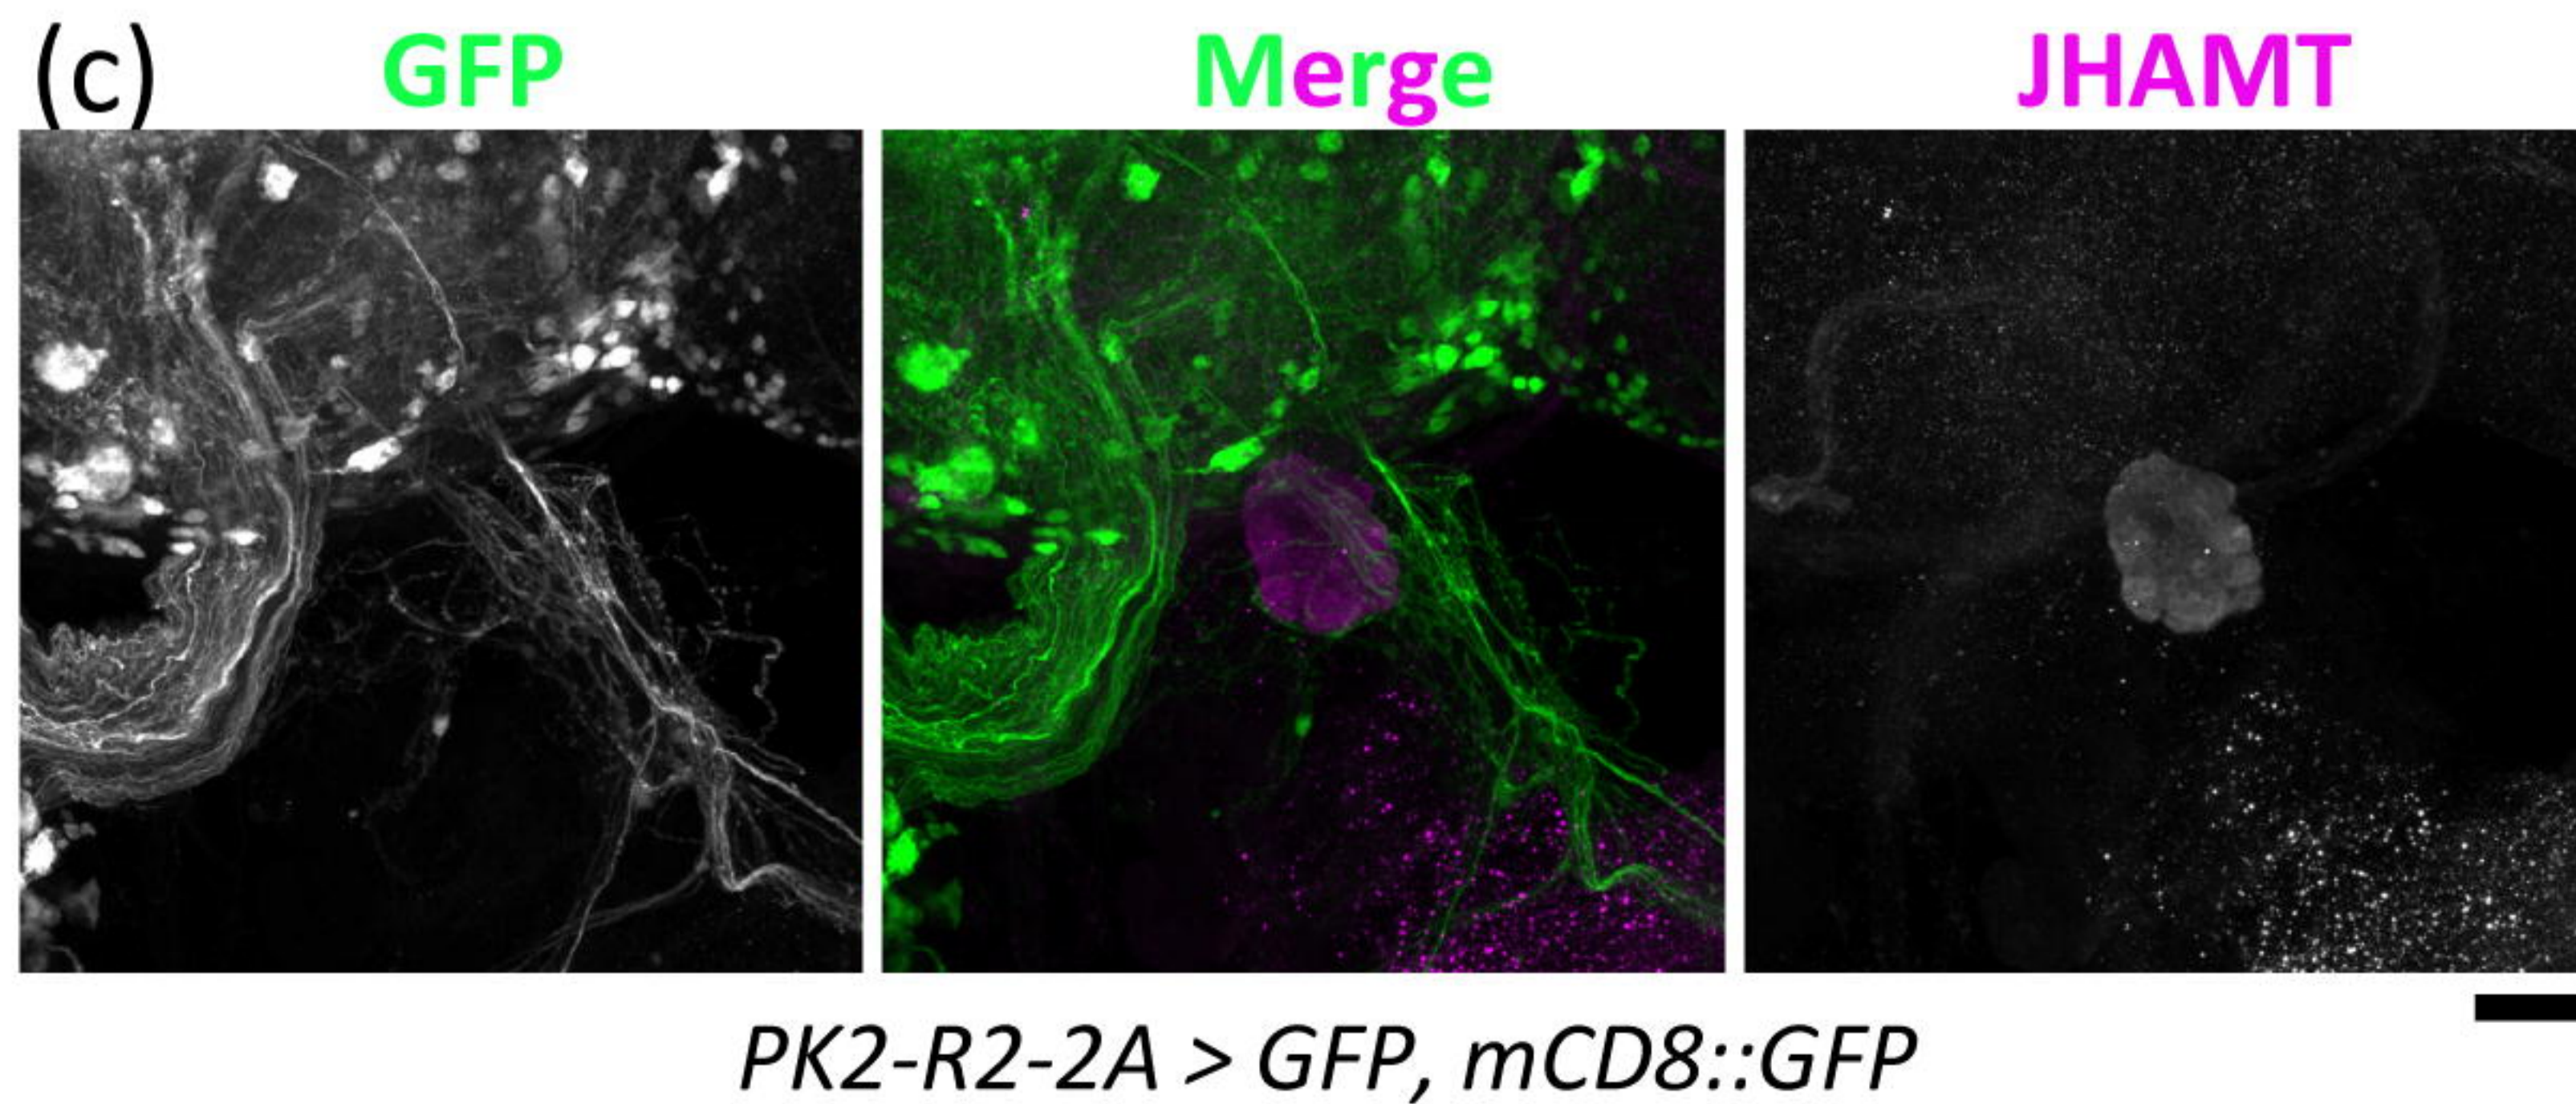

Source: https://biorxiv.org/content/10.1101/2021.03.15.435215v1.full.pdf
